# Supplementary material for: Quantification of sulfur deposition changes under sulfate geoengineering conditions
Source: Copernicus journal article supplement (doi:10.5194/acp-2017-987), 2017-11-01
Supplement: Supplementary file [file acp-2017-987-RC1-supplement.pdf]

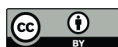

# Quantification of sulfur deposition changes under sulfate geoengineering conditions

Daniele Visioni<sup>1,2</sup>, Giovanni Pitari<sup>1</sup>, Paolo Tuccella<sup>1,2</sup>, and Gabriele Curci<sup>1,2</sup>

<sup>1</sup>Department of Physical and Chemical Sciences, Università dell'Aquila, 67100 L'Aquila, Italy

<sup>2</sup>CETEMPS, Università dell'Aquila, 67100 L'Aquila, Italy

## Abstract.

Sustained injection of sulfur dioxide (SO<sub>2</sub>) in the tropical lower stratosphere has been proposed as a climate engineering technique with the purpose of temporarily **mitigating** the surface warming predicted for the coming decades. Among several possible environmental side effects, the increase of sulfur deposition at the ground surface still needs to be thoroughly investigated. In this study we present results from a composition-climate coupled model (ULAQ-CCM) and a chemistry-transport model (GEOS-Chem), assuming a sustained lower stratospheric equatorial injection of 8 Tg-SO<sub>2</sub>/yr. Total S-deposition is found to globally increase by 5.2% when sulfate geoengineering is deployed, with a clear interhemispheric asymmetry (**3.8% and 10.3% in NH and SH, respectively**). The latter is mostly due to the combination of a quasi-homogeneous tropospheric influx of sulfate from the stratosphere, and the highly inhomogeneous amount of anthropogenic sulfur emissions in the boundary layer (mostly located in the Northern Hemisphere). The two models show good consistency in their sulfur species behavior under background and geoengineering conditions, not only for global and hemispheric budgets but also for regional S-deposition values (except over Arctic and Africa). The consistency between models is not limited to time averaged values, but it extends to monthly and inter-annual deposition changes. The latter is driven essentially by the variability of stratospheric large-scale transport associated to the quasi-biennial oscillation (QBO). According to model-mean values, geoengineering S-deposition percent changes on polar regions range between  $7.7 \pm 0.7\%$  over Antarctica and  $8.5 \pm 1.3\%$  over the Arctic, where the uncertainty reflects the model-averaged interannual variability. Similar S-deposition changes are found over quasi-clean continental regions of the Southern Hemisphere, and smaller values are calculated over polluted continental regions of the Northern Hemisphere ( $2 \div 4\%$ ). The largest difference between the two models is found over Africa and the Arctic (11% and 2%, respectively, for GEOS-Chem, against 2% and 15%, respectively, for ULAQ-CCM).

## 1 Introduction

The **evidences** of the increase in greenhouse gases (GHGs) due to increased anthropogenic emissions and the sequent increase in surface temperatures has started discussions on the possibility of temporarily altering the climate to alleviate some of the consequences. Injecting **sulfate aerosol (in particular, SO<sub>2</sub>)** in order to simulate the cooling effects of explosive volcanic eruption is one of those. In the case of explosive eruptions, the cooling effect comes from the increase in stratospheric aerosol optical depth (by one order of magnitude or more) due to the nucleation of H<sub>2</sub>SO<sub>4</sub> formed through OH oxidation of the initial



volcanic SO<sub>2</sub> cloud injected into the stratosphere (McCormick and Veiga (1992); Lambert et al. (1993) ; Long and Stowe (1994)). ). These gas-particle microphysical processes, coupled to additional aerosol growth due to coagulation, produce an optically active cloud which is highly reflective in the visible and UV, causing a substantial decrease in solar radiation reaching the Earth surface and, subsequently, a global surface cooling. This same effect could in principle be achieved by deliberately  
5 injecting SO<sub>2</sub> into the stratosphere (Budyko (2013); Crutzen (2006); Niemeier and Tilmes (2017)). However, other direct and indirect effects have been observed together with the surface cooling, such as a 2-3 K warming of the tropical lower stratosphere after the Pinatubo eruption (Labitzke and McCormick (1992)) and a decrease of about 20 DU of the tropical ozone column in the 16-28 km layer during October-November 1991 (Grant et al. (1992)).

10 Many studies have already been carried out regarding possible side-effects of sulfate geoengineering (SG) (Visioni et al. (2017a)), mainly under the Geoengineering Model Intercomparison Project (GeoMIP), where several different model experiments regarding SG have been devised (Kravitz et al. (2011); Robock et al. (2011); Kravitz et al. (2012)), considering a background anthropogenic forcing profile corresponding to Representative Concentration Pathway 4.5 (RCP4.5) (Taylor et al. (2012)). In particular, the G4 experiment described in (Kravitz et al. (2011)) aims to simulate a constant injection of a certain  
15 number of Tg-S/yr into the lower stratosphere. Regarding possible effects on ozone, an enhancement of stratospheric ozone destruction has been reported in Tilmes et al. (2008), with subsequent significant increase of surface UVB in the polar regions (Tilmes et al. (2012)) and together with a general decrease in upper tropospheric ozone due to perturbed strat-trop fluxes (Xia et al. (2017)). An increase in the concentration and lifetime of methane has also been found (Visioni et al. (2017b)). Coordinated modeling experiments, such those under the umbrella of the on-going SPARC-CCMI intercomparison, have been  
20 suggested by Tilmes et al. (2015), through the use of a prescribed field of surface area density of stratospheric sulfate aerosols, in order to bound model uncertainties pointed out in Pitari et al. (2014).

Dynamical changes and perturbations in the transport of stratospheric tracer species, due to the local stratospheric heating and to the cooling of the surface have already been studied regarding volcanic sulfate particles, as documented in a rather rich  
25 literature (Pitari (1993); Kirchner et al. (1999); Soden et al. (2002)). The increase of aerosol heating rates in the tropical lower stratosphere affects the stratospheric mean meridional circulation, while at the same time the changing atmospheric stability (due to the surface cooling) alters the planetary wave propagation in the mid-to high latitude lower stratosphere. Regarding possible side effects of SG, a study by Aquila et al. (2014) analyzed the effects on the quasi-biennial oscillation (QBO), a periodic oscillation between zonally symmetric easterly and westerly winds that affects many other components of the dynamics  
30 of the atmosphere, such as the strength of the polar vortex (Holton and Tan (1980)) and the transport of stratospheric aerosols and trace gases from the tropics to mid-high latitudes (Trepte and Hitchman (1992)). In the aforementioned study by Aquila et al. (2014), further confirmed by Niemeier and Timmreck (2015), a prolonged QBO westerly phase in the lower stratosphere was found as a consequence of SG, with larger SO<sub>2</sub> injections producing increasing heating rates and finally larger QBO perturbations.



The lifetime of tropical aerosols in the lower stratosphere may change under different QBO conditions, since the latter controls the isolation of the tropical pipe, thus reducing the amount of large scale transport in the downwelling branch of the Brewer-Dobson circulation. In particular, the stratospheric aerosol lifetime during volcanic eruptions taking place under a QBO easterly shear of the equatorial winds (e.g. Nevado del Ruiz, Pinatubo) has been shown to be longer with respect to the lifetime for eruptions under a QBO westerly wind shear (e.g. Agung, El Chichón) (Pitari et al. (2016b); Pitari et al. (2016a)).

Moreover, a question that often arises regarding SG, is how much the injection of sulfate would affect its deposition, and whether this deposition would take the form of acid rain by considering which portion of deposition is wet and which is dry. Early results on this problem have been obtained by Kravitz et al. (2009), who found that the additional sulfate deposition (assuming all deposition is in the form of sulfuric acid) wouldn't be enough to have any impact on ecosystem throughout the globe. In this work we plan to further expand on their finding.

This paper is organized in 3 subsequent parts, plus the conclusions. In the first part we describe the two models used in the experiment, the University of L'Aquila Composition-Chemistry Model (ULAQ-CCM) and the community Goddard Earth Observing System Chemistry-Transport Model (GEOS-Chem). In the second part we analyze how the lifetime of geoengineering sulfate aerosols can be correlated to changes in the stratospheric circulation and to different phases of the QBO and to better understand the mechanisms regulating the sulfur deposition time variability. In the third part we evaluate model results of sulfur deposition with independent multi-model simulations and available surface observations and we quantify the geoengineering-driven deposition changes on land and ocean regions, looking at both time averaged values and at the time variability induced by inter-annual oscillations of the stratospheric circulation.

## 2 Description of models

In this section, we present a compact description of the two models used in this experiment. The choice to use a chemistry-climate model (CCM) and a chemical transport model (CTM) stems from the need to account for changes of the stratospheric circulation, attributable to chemical and radiative interactions of geoengineering sulfate aerosols. The ULAQ-CCM was already tested in similar conditions both for large explosive volcanic eruptions (Pitari et al. (2016b); Pitari et al. (2016a)) and sulfate geoengineering (Pitari et al. (2014); Vioni et al. (2017b)). At the same time, we wanted to support the global CCM conclusions on sulfate deposition with the results of a 'transport-robust' and widely tested community model such as GEOS-Chem, a CTM using observed meteorology from MERRA reanalysis.

We performed two sets of simulations with both models: an unperturbed (Base) case and a geoengineering perturbed (G4) case, with an injection of 8 Tg-SO<sub>2</sub>/yr in the equatorial stratosphere (between 18 and 25 km of altitude), as described in the GeoMIP G4 experiment (Kravitz et al. (2011)). The simulations were however performed during different time periods for



ULAQ-CCM and GEOS-Chem. For the former, the simulated period is between 2020-2090, with analyses focusing on the 2030-2039 decade, with the Base and the G4 cases both taking place under the same background RCP4.5 scenario. For GEOS-Chem, on the other hand, the simulated period is between 1998 and 2005 (with 1998-99 for spin-up) and the simulations use assimilated dynamics for those years, both in the unperturbed and geoengineering perturbed experiments and with the same sulfur injection amount as in ULAQ-CCM for the G4 case. A third simulation was carried out with ULAQ-CCM as a reference case during the historical period (1990-2010), in order to consistently evaluate model results on regional deposition against GEOS-Chem results, independent multi-model simulations and available surface observations.

A compact summary of model features in these numerical experiments is presented in Table 1, along with the most relevant aerosol related quantities averaged over years 2000-2005 in GEOS-Chem and ULAQ-CCM reference case, and over years 2030-39 for ULAQ-CCM Base (RCP4.5) and G4 simulations. The most important drivers of stratospheric sulfate aerosol formation, horizontal/vertical transport and removal are highly consistent in the two models, namely:  $\text{SO}_2$  oxidation, tropical upwelling coupled to isentropic mixing out of the tropical pipe, tropospheric influx due to large-scale downwelling in the Brewer-Dobson lower branch and gravitational sedimentation. The same is also true for the calculated  $\text{SO}_2$  and  $\text{SO}_4$  lifetimes, with a somewhat longer lifetime for geoengineering stratospheric aerosols in GEOS-Chem with respect to ULAQ-CCM (i.e., 13.5 months versus 12.1 months) mostly attributable to a larger effective radius of aerosols particles in the latter model. The assumption of a uniform  $\text{SO}_2$  stratospheric injection in GEOS-Chem is also significant from this point of view, by keeping a larger fraction of geoengineering sulfate mass at higher altitudes over the tropical tropopause, with respect to ULAQ-CCM, which adopted a Gaussian distribution centred at 21.5 km. Global budgets of sulfur emission and deposition fluxes at the ground surface are also consistent between the two models.

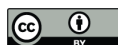

**Table 1.** Summary of model features in this experiment. Aerosol related quantities are averaged over years 2000-2005 in GEOS-Chem and ULAQ-CCM reference, and over years 2030-39 for ULAQ-CCM Base (RCP4.5) and G4 simulations.

| Model                                                                           | GEOS-Chem                                                             | ULAQ-CCM                                         |                                                                       |
|---------------------------------------------------------------------------------|-----------------------------------------------------------------------|--------------------------------------------------|-----------------------------------------------------------------------|
| Years of simulation                                                             | 1998-2005                                                             | 1990-2010                                        | 2020-2050                                                             |
| Type of simulation                                                              | Base + G4                                                             | Reference                                        | Base (RCP4.5) + G4                                                    |
| Ensemble size                                                                   | 1 + 1                                                                 | 2                                                | 1 + 2                                                                 |
| Horizontal and vertical resolution                                              | 4° × 5°, L72<br>hybrid <b>pressur</b> -sigma<br>top: 0.01 hPa         | 5° × 6°, L126<br>log-pressure<br>top: 0.04 hPa   |                                                                       |
| Chemistry                                                                       | On-line (strat + trop)                                                | On-line (strat + trop)                           |                                                                       |
| Dynamics                                                                        | Assimilated <sup>1</sup>                                              | Calculated <sup>2</sup>                          | Calculated <sup>3</sup>                                               |
| QBO                                                                             | <b>Online</b> (with<br>assimilated winds)                             | Nudged (from<br>equatorial wind<br>observations) | Nudged (iteration of<br>observed cycles of<br>equatorial winds)       |
| Tropical w (mm/s)<br>[30-70 hPa] [20S-20N]                                      | +0.24                                                                 | +0.25                                            | +0.25 (Base)<br>+0.26 (G4)                                            |
| Altitude of equatorial injection<br>of SO <sub>2</sub> in experiment G4         | 18-25 km<br>(uniform distribution)                                    | -                                                | 18-25 km<br>(Gaussian distribution)                                   |
| Stratospheric sulfate aerosols<br>[ 50 hPa equatorial effective<br>radius (μm)] | Bulk <sup>4</sup><br>0.19 (Base)<br>0.62 (G4)                         | Calculated size distr <sup>5</sup><br>0.19       | Calculated size distr <sup>5</sup><br>0.19 (Base)<br>0.78 (G4)        |
| Aerosol settling velocity (mm/s)<br>[30-70 hPa] [20S-20N]                       | -0.09 (Base)<br>-0.34 (G4)                                            | -0.09                                            | -0.09 (Base)<br>-0.38 (G4)                                            |
| Stratospheric SO <sub>4</sub> flux out of<br>the tropical pipe (Tg-S/yr)        | 0.05 (Base)<br>2.31 (G4-Base)                                         | 0.04                                             | 0.04 (Base)<br>2.55 (G4-Base)                                         |
| Stratospheric lifetime of<br>SO <sub>4</sub> (months)                           | 13.7 (Base)<br>13.5 (G4-Base)                                         | 12.4                                             | 12.6 (Base)<br>12.1 (G4-Base)                                         |
| Stratospheric lifetime of<br>SO <sub>2</sub> (days)                             | 27.9 (Base)<br>29.0 (G4-Base)                                         | 27.5                                             | 23.4 (Base)<br>32.1 (G4-Base)                                         |
| S-emission fluxes<br>(Tg-S/yr) [Base]                                           | 60 (SO <sub>x</sub> )<br>18 (DMS)                                     | 67 (SO <sub>x</sub> )<br>28 (DMS)                | 50 (SO <sub>x</sub> )<br>28 (DMS)                                     |
| S-deposition fluxes<br>(Tg-S/yr) [Base]                                         | 76.8 (total)<br>44.1 (land)<br>32.7 (ocean)                           | 93.3 (total)<br>54.0 (land)<br>39.3 (ocean)      | 76.2 (total)<br>38.0 (land)<br>38.2 (ocean)                           |
| S-deposition flux changes<br>(Tg-S/yr) [G4-Base]                                | 4.0 (total) [5.2%]<br>[3.2% NH 10.6% SH]<br>1.5 (land)<br>2.5 (ocean) | -                                                | 4.0 (total) [5.2%]<br>[4.4% NH 10.0% SH]<br>1.8 (land)<br>2.2 (ocean) |

<sup>1</sup> 30-year reanalysis MERRA, at native horizontal resolution of 0.5° × 0.666°.

<sup>2</sup> Sea surface temperatures from observations; calculated land temperatures.

<sup>3</sup> Surface temperatures from CCSM-CAM4, separately for RCP4.5 and G4 (Visioni et al. (2017b)).

<sup>4</sup> Effective radius calculated from sulfate volume density, using the fit of Grainger et al. (1995).

<sup>5</sup> Sectional approach (Pitari et al. (2002); Pitari et al. (2014))

The sulfur budget in both models is summarized in Tables 2-4, looking at integrated sulfur emission and deposition fluxes for baseline conditions over land, ocean and entire globe, including a comparison with data presented in Vet et al. (2014) and Lamarque et al. (2013). Both models are consistent with observations-multimodel coupled data of sulfur emission and depo-



sition fluxes reported in Vet et al. (2014), as well as with multimodel ensemble data reported in Lamarque et al. (2013) (see Table 2). Global DMS emission in GEOS-Chem is lower than in ULAQ-CCM: these are in the lower and upper bounds of the variability shown in Lamarque et al. (2013). The global sulfur deposition is always somewhat smaller than the total  $\text{SO}_x$ +DMS emission, due to the 87% yield of DMS oxidation in  $\text{SO}_2$ , which finally produces sulfate (as discussed in Lamarque et al. (2013)); the remaining part goes into MSA aerosols, that are finally lost by wet deposition. The geoengineering  $\text{SO}_2$  injection adopted in this study (8 Tg- $\text{SO}_2$ /yr, i.e., 4 Tg-S/yr) represents globally 5.1% of the baseline anthropogenic and natural sulfur emissions (see 3), and the resulting surface deposition represents 5.2% of the baseline deposition, with a significant inter-hemispheric asymmetry (3.8% and 10.3% in NH and SH, respectively, as a model average) (see Table 1). The latter is mostly due to the quasi-homogeneous tropospheric influx of sulfate formed in the stratosphere from a geoengineering equatorial  $\text{SO}_2$  injection, and by the highly inhomogeneous amount of anthropogenic sulfur emissions in the boundary layer (mostly localized in the Northern Hemisphere).

One important difference between the GEOS-Chem simulations performed here and ULAQ-CCM is that the first adopts a bulk approach for stratospheric aerosols, whereas ULAQ-CCM predicts on-line the aerosol size distribution, with a more detailed calculation of the net sedimentation loss. The explicitly calculated effective radius (ULAQ-CCM) or indirectly derived using the Grainger et al. (1995) method (GEOS-Chem) are both consistent with the SAGE-II derived estimates approximately one year after the Pinatubo eruption, with comparable integrated stratospheric sulfate mass (Pitari et al. (2014); Vioni et al. (2017b)). The breakdown of global  $\text{SO}_x$  deposition fluxes, among  $\text{SO}_2$ ,  $\text{SO}_4$  dry and wet deposition terms, is summarized in Table 4 for the two models, and a comparison is made with multimodel data presented in Lamarque et al. (2013). As expected, the deposition of geoengineering  $\text{SO}_x$  (G4-Base) is greatly attributable to  $\text{SO}_4$  wet deposition (85.8%), with a 11.5% due to  $\text{SO}_x$  dry deposition (model averages).

**Table 2.** Integrated sulfur emission and deposition fluxes for baseline conditions over land, ocean and entire globe, for ULAQ-CCM and GEOS-Chem, compared to Vet et al. (2014) and Lamarque et al. (2013) values (Tg- S/yr).

|                        | GEOS-Chem<br>[2000-05] | ULAQ-CCM<br>[2000-05] | Vet et al. (2014)<br>[2001] | Lamarque et al. (2013)<br>[2001] | ULAQ-CCM<br>[2030-39] | Lamarque et al. (2013)<br>[2030 RCP4.5] |
|------------------------|------------------------|-----------------------|-----------------------------|----------------------------------|-----------------------|-----------------------------------------|
| Land total emissions   | 49.1                   | 59.7                  | 50.4                        | 56                               | 45.0                  | 43                                      |
| Ocean total emissions  | 28.9                   | 35.3                  | 40.6                        | 33                               | 34.6                  | 35                                      |
| Total globe emissions  | 78.0                   | 95.0                  | 91.0                        | $89 \pm 13$                      | 77.6                  | $78 \pm 6$                              |
| Land total deposition  | 44.1                   | 54.0                  | 40.2                        | 44                               | 38.0                  | 36                                      |
| Ocean total deposition | 32.7                   | 39.3                  | 44.6                        | 43                               | 38.2                  | 40                                      |
| Total globe deposition | 76.8                   | 93.3                  | 84.8                        | $87 \pm 17$                      | 76.2                  | $76 \pm 16$                             |

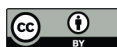

**Table 3.** Breakdown of global sulfur emission fluxes (Tg-S/yr).

|                                | GEOS-Chem<br>[2000-05] | ULAQ-CCM<br>[2000-05] | Lamarque et al. (2013)<br>[2001] | ULAQ-CCM<br>[2030-39] | Lamarque et al. (2013)<br>[2030 RCP4.5] |
|--------------------------------|------------------------|-----------------------|----------------------------------|-----------------------|-----------------------------------------|
| SO <sub>x</sub>                | 60                     | 67                    | 66                               | 50                    | 55                                      |
| DMS                            | 18                     | 28                    | 23                               | 28                    | 23                                      |
| Total Base                     | 78                     | 95                    | 89 ± 14                          | 78                    | 78 ± 6                                  |
| SO <sub>2</sub> geoengineering | 4.0 [5.1%]             | -                     | -                                | 4.0 [5.1%]            | -                                       |

**Table 4.** Breakdown of global SO<sub>x</sub> deposition fluxes (percent).

|                                | GEOS-Chem<br>[2000-05]<br>Base | Lamarque et al. (2013)<br>[2000]<br>G4-Base | GEOS-Chem<br>[2000-05]<br>G4-Base | ULAQ-CCM<br>[2030-2039]<br>Base | Lamarque et al. (2013)<br>[2030 RCP4.5]<br>G4-Base | ULAQ-CCM<br>[2030-2039]<br>G4-Base |
|--------------------------------|--------------------------------|---------------------------------------------|-----------------------------------|---------------------------------|----------------------------------------------------|------------------------------------|
| SO <sub>2</sub> dry deposition | 27.5                           |                                             | 3.2                               | 35.7                            |                                                    | 9.7                                |
| SO <sub>2</sub> wet deposition | 9.8                            |                                             | 1.2                               | 6.6                             |                                                    | 4.2                                |
| SO <sub>4</sub> dry deposition | 8.8                            |                                             | 6.8                               | 6.0                             |                                                    | 3.3                                |
| SO <sub>4</sub> wet deposition | 53.9                           |                                             | 88.8                              | 51.7                            |                                                    | 82.8                               |
| SO <sub>x</sub> dry deposition | 36.3                           | 41.9                                        | 10.0                              | 41.7                            | 40.9                                               | 13.0                               |
| SO <sub>x</sub> wet deposition | 63.7                           | 58.1                                        | 90.0                              | 58.3                            | 59.1                                               | 87.0                               |

Both models have been fully described in recent literature. For the sake of completeness, we report in the following two sub-sections some of the main model features, in particular those relevant for sulfur species and aerosols.

## 2.1 ULAQ-CCM

- 5 ULAQ-CCM has been described in its first version in Pitari et al. (2002), and later in the framework of SPARC-CCMVal (Stratosphere-troposphere Processes And their Role in Climate - Chemistry Climate Models Validation) and the on-going SPARC-CCMI (Chemistry-Climate Models Intercomparison) campaigns (Eyring et al. (2006); Morgenstern et al. (2010); Morgenstern et al. (2017)). Important model updates regarding horizontal and vertical resolution (now T21 with 126 log pressure levels), species cross sections and Schumann-Runge bands treatment, and upgrades of the radiative transfer code were described and tested in Pitari et al. (2014). This radiative module, crucial for a good prediction of the sulfate aerosol interaction with shortwave solar and longwave planetary radiation has been tested for tropospheric aerosols in SPARC-AEROCOM (Randles et al. (2013)) and also for stratospheric aerosols after major volcanic eruptions (Pitari et al. (2016b)). The shortwave radiative module uses a two-stream delta-Eddington approximation and operates on-line in the ULAQ-CCM. It is used for both photolysis rate calculations in ultra-violet (UV) to visible (VIS) wavelengths and also for solar heating rates and radiative forcing in UV-VIS and solar near-infrared (NIR) bands. In addition, a companion broadband, k-distribution longwave radiative module is used to compute radiative transfer and heating rates in the planetary infrared spectrum (Chou (2001)).





The skills of the model regarding upper troposphere and lower stratosphere (UTLS) dynamics have been evaluated in multi-model assessment both in the tropical region (Gettelman et al. (2010)) and in the extra-tropics (Hegglin et al. (2010)). Particularly important for the geoengineering study discussed in the present study are the effects on lower stratospheric dynamics of the QBO and sea surface temperatures (SST). The ULAQ-CCM uses a nudged QBO extrapolated from an observed historical data series (Morgenstern et al. (2017)). The treatment of surface temperatures, and their importance under a geoengineering scenario, has been discussed in Visionsi et al. (2017b). ULAQ-CCM does not have a coupled ocean, but the simulation under a control scenario RCP4.5 and the geoengineering simulation G4 use different surface temperatures, that are externally calculated in a fully coupled atmosphere-ocean model (Community Climate System Model-Community Atmosphere Model v. 4.0 (CCSM-CAM4)).

For the G4 simulations,  $\text{SO}_2$  is injected at  $0^\circ$  longitude on the equator, throughout the altitude range 18-25 km with a Gaussian distribution centered at 21.5 km. Stratospheric  $\text{SO}_2$  oxidation by OH (calculated on-line in the full chemistry module) produces  $\text{SO}_4$ . The resulting size distribution of supercooled  $\text{H}_2\text{O}$ - $\text{H}_2\text{SO}_4$  particles is calculated in an aerosol microphysics module with sectional approach, starting from gas-particle interaction processes (homogeneous and heterogeneous nucleation, sulfuric acid condensation, water vapor growth) and then including aerosol coagulation, gravitational settling and evaporation in the upper stratosphere.

Aerosol optical thickness and single scattering albedo are calculated as a function of wavelength at all model grid-points, with on-line calculation of up/down diffuse radiation and absorption of solar near-infrared and planetary radiation. Aerosol modulated radiative fluxes may then explicitly impact species photolysis and heating rates of ozone and aerosols. The surface area density of sulfate aerosols is calculated interactively in the model starting from the calculated size distribution of these particles, as well as for polar stratospheric cloud particles, which are also treated with a sectional approach (explicit microphysics, particle transport, impact on stratospheric denitrification and dehydration) without imposing thermodynamics equilibrium (Pitari et al. (2002); Butchart et al. (2010); Morgenstern et al. (2017)). This allows an explicit full coupling of aerosol, chemistry and radiation modules in the ULAQ-CCM; for this reason the acronym CCM (in this specific case) results to be more appropriate for 'composition-climate' rather than for 'chemistry-climate' model, as it usually stands for. Geoengineering sulfate aerosols (or those produced after major volcanic eruptions) may significantly perturb wavelength-dependent aerosol extinction, absorption and asymmetry parameter at all model grid-points, thus allowing on-line calculation of radiative flux perturbations, with consequent changes of  $\text{O}_2$  and  $\text{O}_3$  photolysis,  $\text{O}_3$  heating rates and aerosol heating rates in the solar and planetary infrared ranges (Pitari et al. (2014); Pitari et al. (2016b)).

In the troposphere, the ULAQ-CCM includes the major aerosol families (sulfate, nitrate, organic and black carbon, soil dust, sea salt). The sulfate aerosol module starts from DMS and  $\text{SO}_2$  emissions (fossil fuel, biomass burning, non-explosive volcanoes) (Eyring et al. (2013); Lamarque et al. (2010)) and includes  $\text{SO}_x$  chemistry with gas phase oxidation of DMS into  $\text{SO}_2$ , via reactions with OH (daytime) and  $\text{NO}_3$  (night time), and gas phase and aqueous/ice  $\text{SO}_2$  oxidation (by OH and  $\text{H}_2\text{O}_2$ ,  $\text{O}_3$ ,





respectively) to produce  $\text{SO}_4$  (Feichter et al. (1996); Clegg and Abbatt (2001)). As in the stratosphere, gas-particle conversion allows formation of aerosol particles, typically made of ammonium sulfate (in the boundary layer and lower-mid troposphere) or supercooled  $\text{H}_2\text{O}$ - $\text{H}_2\text{SO}_4$  in the upper troposphere. The resulting size distribution is regulated by the above cited microphysical processes. The tropospheric and stratospheric  $\text{SO}_x$  budget in the ULAQ-CCM (for unperturbed background conditions) was first discussed in Pitari et al. (2002) and more recently in Pitari et al. (2016c), with focus on the role of non-explosive volcanic sulfur emissions. Surface mixing ratios of long-lived species and gridded emission fluxes of tropospheric ozone precursors ( $\text{NO}_x$ , CO, VOC) and aerosols are all prescribed in the RCP4.5 baseline scenario, following the Eyring et al. (2013) recommendations for the CCMI intercomparison campaign; gridded data for short-lived species emissions were made available from Lamarque et al. (2010)).

Dry deposition of gas species and aerosols is calculated in terms of a surface deposition velocity (Muller and Brasseur (1995)). Washout of soluble gases and aerosols is treated as a first-order loss rate, in terms of climatological monthly averaged precipitation rates; the vertical distribution is calculated as a function of climatological distributions of cumulonimbus and nimbostratus clouds (Muller and Brasseur (1995); Pitari et al. (2002)). The aerosol gravitational sedimentation is treated in sectional approach, by calculating the appropriate settling velocity for a given particle composition and size.

## 2.2 GEOS-Chem

GEOS-Chem is a community global Eulerian chemistry-transport model originally described in Bey et al. (2001). Here we employ version v11-01 of the model ([www.geos-chem.org](http://www.geos-chem.org)). GEOS-Chem is driven by assimilated meteorological fields from the Goddard Earth Observation System (GEOS) of the NASA Global Modeling and Assimilation Office (GMAO). Here we use the 30-year reanalysis MERRA provided at a native horizontal resolution of  $0.5^\circ \times 0.666^\circ$  and degraded here at  $4^\circ \times 5^\circ$  for GEOS-Chem simulations. The number of hybrid pressure-sigma vertical levels is 72 up to 0.01 hPa (ca. 80 km), with spacing gradually increasing with height from 0.1 km near the surface to 2 km near model top. Advection is calculated using the semi-Lagrangian scheme developed by Lin and Rood (1996), convective transport is calculated following Wu et al. (2007), and mixing in the planetary boundary layer is calculated using the non-local scheme implemented by Lin and McElroy (2010).

Anthropogenic emissions of CO,  $\text{NO}_x$  and  $\text{SO}_2$  use the global EDGAR4.2 inventory (Lin and McElroy (2010)), complemented with regional inventories for US, Canada, Mexico, Europe and East Asia (see [http://acmg.seas.harvard.edu/geos/geos\\_chem\\_narrative.html](http://acmg.seas.harvard.edu/geos/geos_chem_narrative.html) for details). For  $\text{N}_2\text{O}$ , CFCs, HCFCs, OCS and other chlorine species a fixed global mixing ratio is specified at the model surface (Eastham et al. (2014)), while bromine species emissions are described in Parrella et al. (2012). Eruptive and non-eruptive volcanic  $\text{SO}_2$  emissions use the AEROCOM database as implemented by Fisher et al. (2011).

The chemical mechanism of GEOS-Chem includes a detailed  $\text{HO}_x$ - $\text{NO}_x$ -VOC- $\text{O}_3$ - $\text{BrO}_x$  tropospheric chemistry originally described by Bey et al. (2001) and updated to the most recent JPL/IUPAC recommendations. Stratospheric chemistry mech-



anism uses the Universal tropospheric-stratospheric Chemistry eXtension (UCX) developed by Eastham et al. (2014). The sulfate-nitrate-ammonium and carbonaceous aerosol chemistry was originally developed by Park et al. (2003), Park et al. (2004), and subsequently updated for the thermodynamic module and the organic aerosol scheme ([http://acmg.seas.harvard.edu/geos/geos\\_chem\\_narrative.html](http://acmg.seas.harvard.edu/geos/geos_chem_narrative.html)). Stratospheric aerosol simulation is split in two main components, liquid and solid (Eastham et al., 2014). The former includes all stratospheric sulfate aerosols, ranging from  $\text{H}_2\text{SO}_4$  liquid binary solutions (LBS) to supercooled ternary solution (STS). The latter consists of type Ib and type II polar stratospheric clouds (PSCs), made up of nitric acid trihydrate (NAT) and ice. Up to date heterogeneous chemistry reactions are included in the mechanism (Eastham et al. (2014)). Photolysis rates for both the troposphere and the stratosphere are calculated using the Fast-JX code (Bian and Prather (2002)).

Dry deposition is calculated with the resistance-in-series scheme proposed by Wesely (1989), and implemented in GEOS-Chem as described by Wang et al. (1998) for gases and Zhang et al. (2001) for aerosols. Aerosol gravitational settling in the stratosphere is described in Eastham et al. (2014). Wet deposition scheme is implemented as described in Amos et al. (2012) for gases and Liu et al. (2001) for water-soluble aerosols.

### 3 Stratospheric sulfate aerosols

In this section we analyze the distribution and lifetime of the injected stratospheric aerosols firsts by looking at the multi-annual average for both models and then by looking at the time-dependent modifications of the sulfate lifetime caused by stratospheric dynamics.

#### 3.1 Time-averaged sulfate distribution

ability in producing a correct confinement of sulfate aerosols in the tropical stratosphere in SG or post-volcanic conditions has already been extensively tested, with comparison against SAGE II data following the Pinatubo eruption, see Pitari et al. (2014), Pitari et al. (2016b), Vioni et al. (2017b). ). A fully comparable behavior is also shown in GEOS-Chem, which, on the other hand, was not tested before regarding a stratospheric sulfur injection. In Fig. 1 we show the zonally averaged  $\text{SO}_4$  mixing ratio averaged over the simulation period for both models, for both Base and G4 experiments (SG with 8 Tg- $\text{SO}_2$  injection). This is done in order to highlight similarities between the two models in the stratospheric aerosol tropical confinement, combined with isentropic horizontal mixing in the layer immediately above the tropopause, which enables poleward transport of sulfate from the tropical reservoir.

Although the aerosol confinement looks similar, some differences are present. Fig. 2a shows the  $\text{SO}_4$  equatorial vertical profile, corresponding to the zonal mean values in Fig. 1. There is a small but significant difference in the distribution of trop-

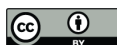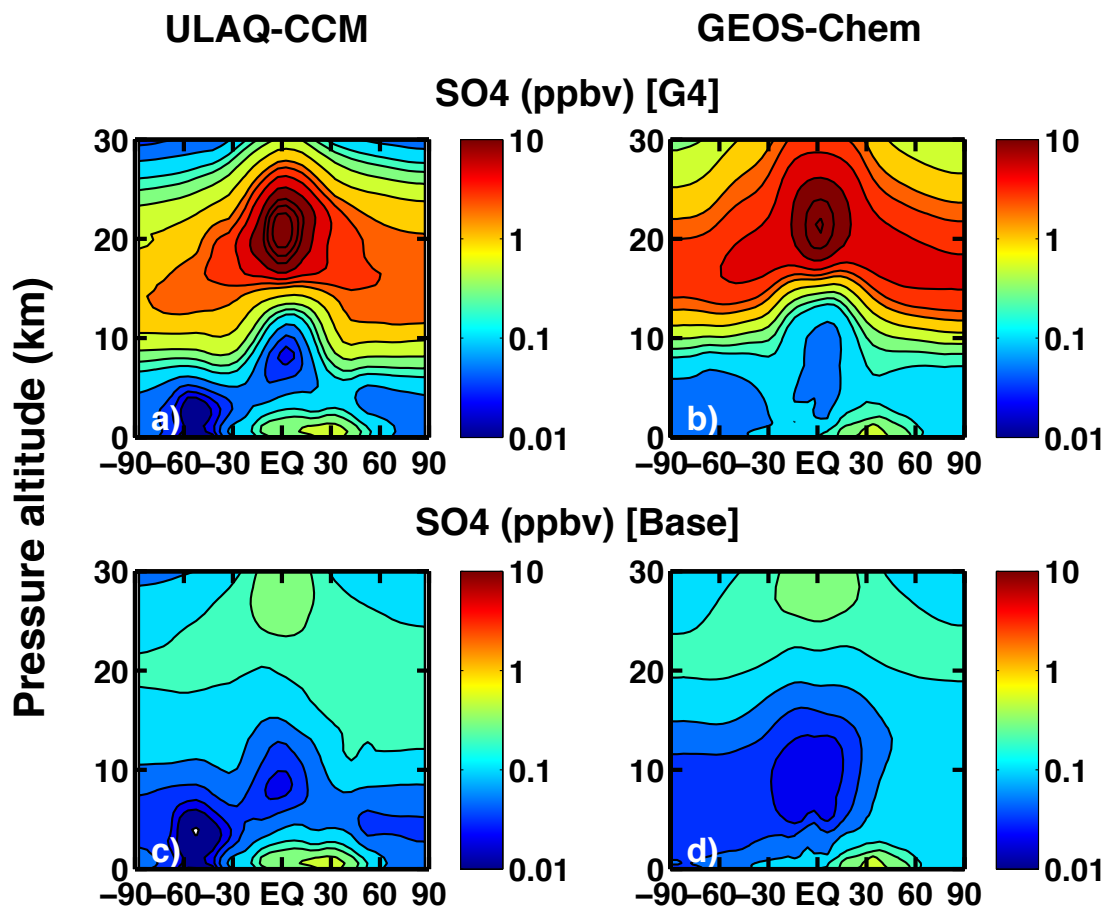

**Figure 1.** SO<sub>4</sub> mixing ratios (ppbv) averaged from 2030 to 2039 for ULAQ-CCM (panels a,c) and from 2000 to 2005 for GEOS-Chem (panels b,d). Panels (a,b) are for the G4 experiment; panels (c,d) are for the Base experiment. The contour line increment is logarithmic, with three lines per decade.

ical SO<sub>4</sub> between the two cases, with the ULAQ-CCM maximum situated at a somewhat lower height with respect to the one predicted by GEOS-Chem. Furthermore, 80% of the SO<sub>4</sub> mass is situated in the 20-70 hPa region for GEOS-Chem while 78% of the SO<sub>4</sub> mass is confined in the 40-90 hPa region for ULAQ-CCM. The reasons for this are substantially two: on one hand, there is a difference in sulfur injection, because ULAQ-CCM injects SO<sub>2</sub> with a Gaussian distribution centered at 21.5 km altitude. In this way, a larger sulfate fraction is kept in the 19-21 km band, with respect to the one resulting from the GEOS-Chem SG simulation, where similar SO<sub>2</sub> injections were adopted in the two models. This is consistent with differences found in the aerosol vertical distribution between ULAQ-CCM and GEOS-CCM in Vioni et al. (2017b), where a similar difference was present. On the other hand, GEOS-Chem uses a bulk approach for sulfate aerosols, with an assumed aerosol effective radius smaller with respect to the one ULAQ-CCM calculates from a predicted aerosol size distribution with a sectional approach (see

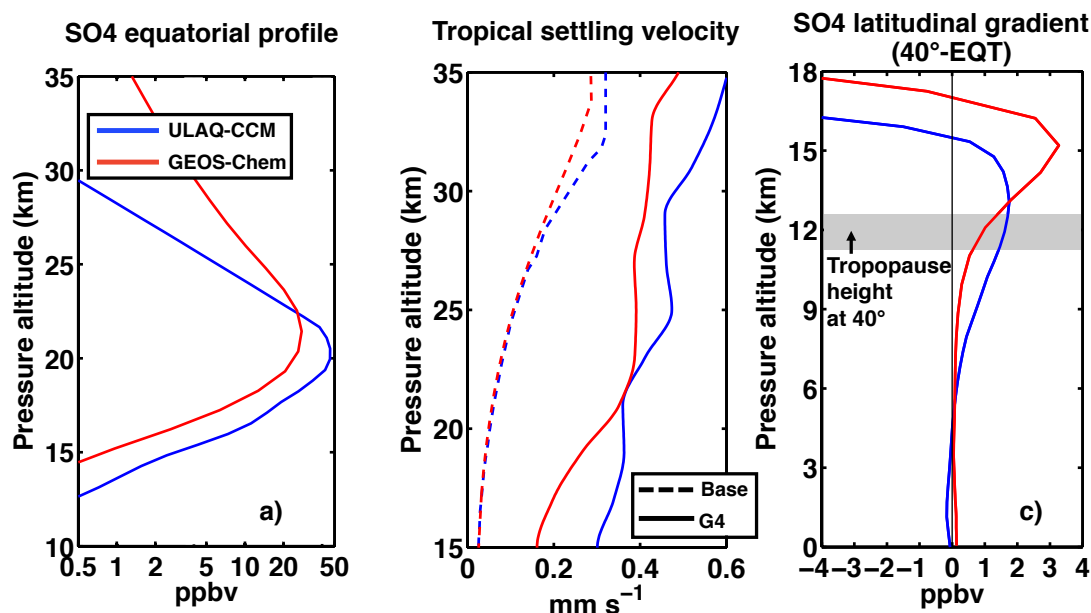

**Figure 2.** Panel (a): equatorial SO<sub>4</sub> profiles (ppbv) for ULAQ-CCM (blue) and GEOS-Chem (red), in the G4 experiment (panels a,b of Fig.1). Panel (b): tropical settling velocities (mm/s) for the two models (averaged 20S-20N), with dashed and solid lines for Base and G4 experiments, respectively. Panel (c): latitudinal SO<sub>4</sub> gradient (ppbv), calculated in the G4 experiment as the mixing ratio difference between 40° (40S and 40N average) and the equator.

Table 1). Some differences will then result in the tropical settling velocities of the aerosol particles, as shown in Fig. 2b, from which we may expect a somewhat enhanced downward displacement in ULAQ-CCM.

A third difference is shown in Fig. 2c: the latitudinal gradient of SO<sub>4</sub> at the altitude of the mid-latitude tropopause (and also a few kilometers below it) is larger in ULAQ-CCM with respect to GEOS-Chem. This results from a slower upper tropospheric horizontal mixing in ULAQ-CCM and does not allow (with respect to GEOS-Chem) the same amount of tropospheric tropical influx of sulfate moving downwards from the region where the large scale strat-trop exchange (STE) is maximum. Implications of this effect on the latitudinal distribution of sulfur deposition will be discussed ahead.

Once the injected sulfate has reached a steady state, it has to come down at a rate of 4 Tg-S/yr, the same rate at which it is injected. In Fig. 3 a budget scheme of geoengineering sulfur fluxes is presented for both models (G4-Base). Sulfate aerosols, formed in the tropical lower stratosphere after oxidation of SO<sub>2</sub> injected continuously at the equator above the tropopause, may leave the tropical pipe in two ways: less than half is removed directly across the tropical tropopause, due to particle gravitational sedimentation and large scale downwelling taking place in limited regions of the tropical tropopause; the rest is moved horizontally out of the tropics via poleward isentropic transport. Once the sulfate aerosols have reached the subtropics and

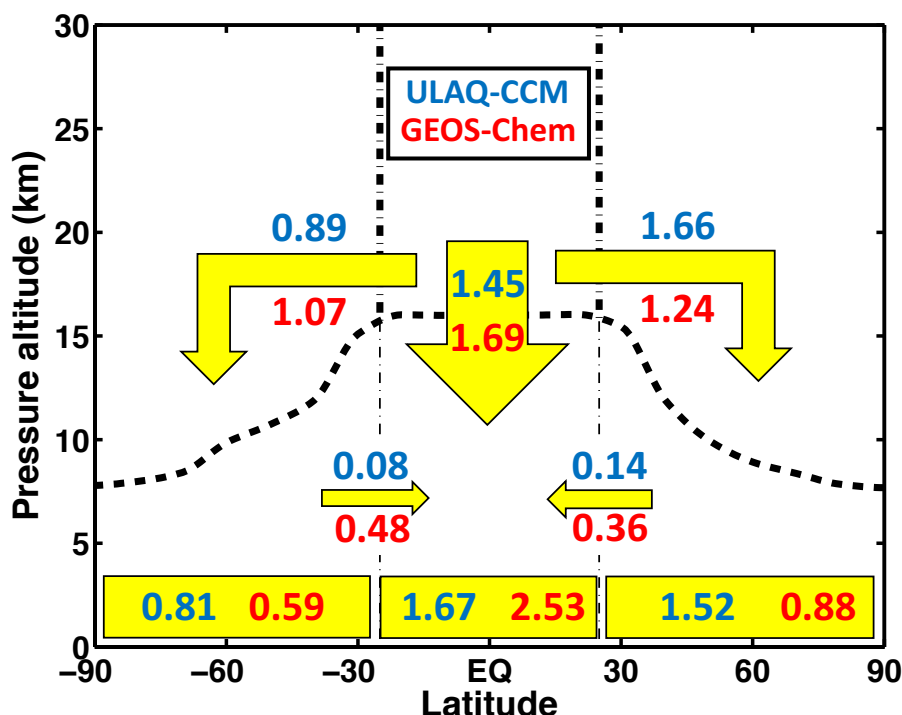

**Figure 3.** Breakdown of geoengineering sulfur fluxes for ULAQ-CCM (blue, average 2030-2039) and GEOS-Chem (red, average 2000-2005). The dashed line represents the mean tropopause, the dashed-dotted lines represent the subtropical barriers. The lowermost boxes represent sulfur surface deposition. All values are in Tg-S/yr.

mid-latitudes, they may be efficiently removed from the stratosphere by extratropical STE in the lower branch of the Brewer-Dobson circulation (and to a lesser extent via particle gravitational sedimentation).

The two models agree on the general partitioning of stratospheric sulfur fluxes, although some differences are present, especially in the horizontal flux moving toward the northern hemisphere mid-latitudes, which is 0.42 Tg-S/yr larger in ULAQ-CCM compared to GEOS-Chem. A larger inter-model difference is found in the tropospheric mixing from the mid-latitudes toward the tropics. The upper tropospheric tropical influx of sulfur is calculated to be much larger in GEOS-Chem (0.84 Tg-S/yr) with respect to ULAQ-CCM (0.22 Tg-S/yr), thus explaining the larger upper tropospheric latitudinal gradient of geoengineering sulfate presented in Fig. 2c. This difference is then reproduced in the zonally averaged deposition, which presents an excess deposition of 0.86 Tg-S/yr at the tropics in GEOS-Chem with respect to ULAQ-CCM. The discussion on deposition results will be further expanded in Section 4.



### 3.2 QBO impact on stratospheric sulfate

Previous studies (Aquila et al. (2014); Niemeier and Timmreck (2015)) have focused on the potential effects of sulfate geo-engineering on the QBO. Aquila et al. (2014), for instance, reported an increasing stratospheric aerosol burden the more the QBO shifted to a lower stratospheric permanent W-phase (i.e., E shear of the mean zonal equatorial winds). On the other hand, the modulation the QBO itself may introduce on the stratospheric aerosol lifetime (and deposition) has not been explored in depth in case of a geoengineering constant tropical injection of sulfur. This effect, however, was studied for the time evolution of the unperturbed stratospheric aerosol layer by Hommel et al. (2015). They found that the aerosol burden non-linearly correlate with the QBO phase because of a wide range of reasons, amongst those the rather wide differences in the size range of the aerosols. The QBO impact on the e-folding time of stratospheric sulfate aerosols injected in past major volcanic eruptions was studied in Pitari et al. (2016b), where a clear correlation is found between a larger e-folding time and a QBO E shear of the mean zonal equatorial winds, as a consequence of a higher aerosol confinement in the tropical pipe (consistently with the findings of Trepte and Hitchman (1992)). It should be noted that the stratospheric aerosol distribution in case of SG, or after a major tropical explosive volcanic eruption, is so different with respect to the atmospheric background, both spatially and in size (see Fig. 1 and Table 1), that the expected QBO impact might significantly differ in the two cases.

Fig. 4 presents a schematic representation of the interactions between the QBO and stratospheric sulfate aerosols. The QBO modulation of the mean zonal wind shear and (indirectly) of the stratospheric mean meridional circulation may efficiently impact the tropical pipe confinement of atmospheric tracers. This, in turn, is expected to produce changes in the global scale aerosol distribution and lifetime, thus modulating the lower stratospheric aerosol heating rates. QBO-driven changes in aerosol distribution and lifetime produce in turn modifications of the STE, which eventually regulates the latitudinal distribution of the sulfur deposition. Direct QBO effects may be visible both in models with prescribed circulation (CTMs) and with calculated dynamics via chemistry-climate coupling (CCMs), whereas the effects of changes in aerosol heating rates can only be seen in CCMs. The ULAQ-CCM does not include an internally-generated QBO, but uses instead a nudging approach (see Table 1), so that the schematic representation in Fig. 4 shows the further modification of the QBO by the aerosol heating rates as a possible significant effect (Aquila et al. (2014); Niemeier and Timmreck (2015)), but not explored in the present work.

In the lower part of Fig. 4 scheme, we focused on how the aerosol lifetime is modulated by QBO. On one hand, the lifetime depends on particles size. With an increased tropical confinement (E shear), the sulfate aerosols have more time to grow through coagulation and gas condensation, with resulting larger particles that may sediment faster, thus enhancing the tropospheric influx and decreasing the stratospheric lifetime. On the other hand, the aerosol lifetime is regulated by how much time they may remain confined in the tropical pipe. Once transported at the subtropics and at the mid-latitudes by means of lower stratospheric poleward isentropic transport, the aerosol may effectively be removed from the stratosphere by STE; this extra-tropical horizontal transport is favored during a QBO W shear (Trepte and Hitchman (1992)). The lower part of Fig. 4 is

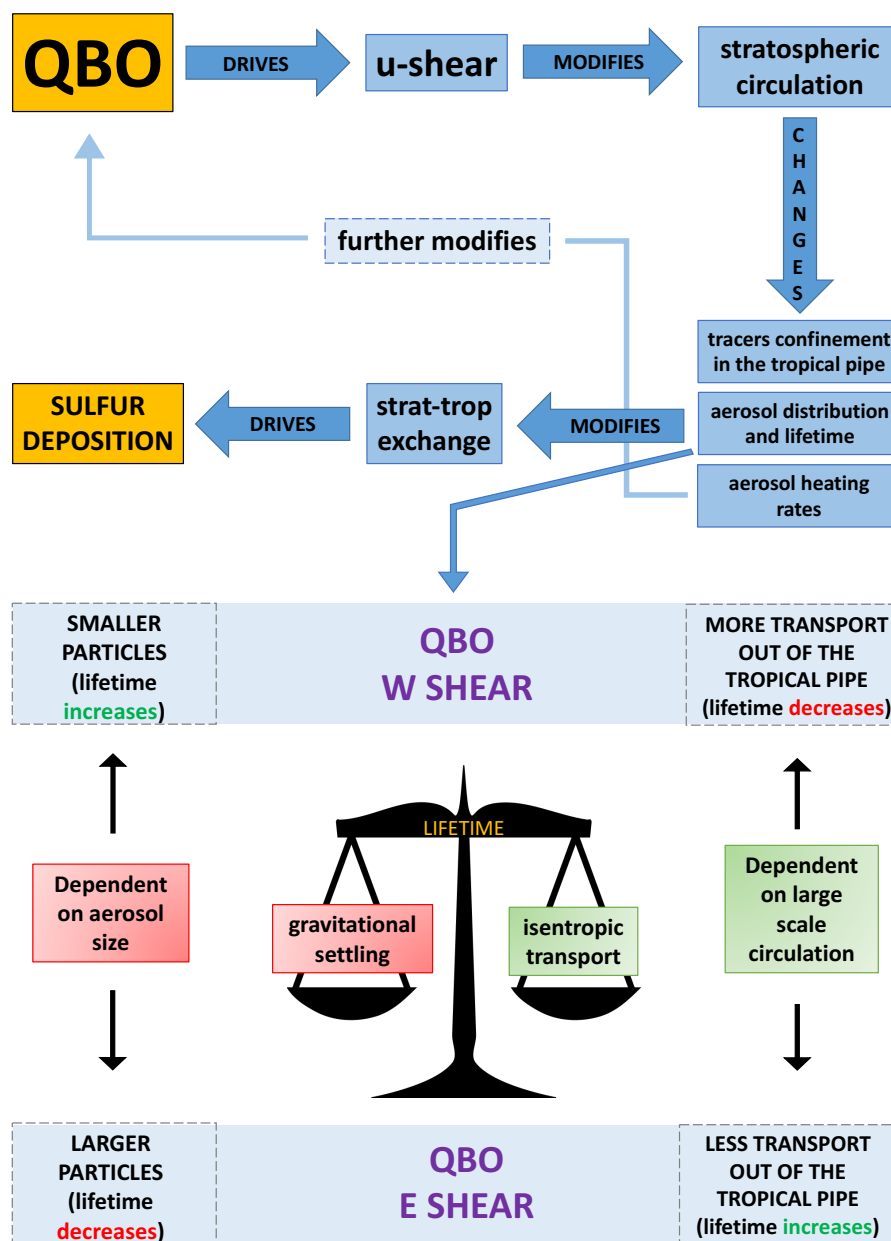

**Figure 4.** Upper part: schematic links between QBO, stratospheric circulation, geoengineering aerosol lifetime, strat-trop exchange, sulfur deposition at the surface. Lower part: schematic balance of the two main effects regulating the sulfate aerosol lifetime, starting from the driving QBO wind shear.

an attempt to represent the 'balance' between the competing QBO-effects that regulate the stratospheric aerosol lifetime.





In Fig. 5 and Fig. 6 we compare the stratospheric sulfate lifetime series (Fig. 5 for ULAQ-CCM and Fig. 6 for GEOS-Chem) correlated with the QBO-driven changes of dynamical quantities, as discussed in Fig. 4. The lifetime of the injected sulfate is calculated as the stratospheric burden in the G4 case minus the stratospheric burden in the Base case divided by the integrated stratospheric loss of the sulfate, which at the steady state (on average) is equal to the source, that is 4 Tg-S/yr. In Fig. 5a and Fig. 6a the lifetime (in black) is compared with the equatorial mean zonal wind shear (in red). This shear is calculated differently for the two models, considering the already discussed differences in the vertical extent of most of the sulfate burden (Fig. 2a). For both models we observe an oscillation of the lifetime that is strongly anti-correlated with the equatorial u-shear, with positive values (W shear) connected with a shorter lifetime. Since during a W shear a decreased equatorial upwelling is present (see Trepte and Hitchman (1992)), we see in Fig. 5b and Fig. 6b how then the oscillations of the residual vertical velocity ( $w^*$ ) anomalies are positively correlated with the lifetime oscillations, considering the  $w^*$  value at the center of the vertical layer where the largest fraction of the tropical aerosol mass is confined. This is because during periods of QBO W shear, a smaller amount of tropical aerosols is moved upwards to the mid-stratosphere and a larger amount remains displaced in the lower part of the tropical pipe, where horizontal isentropic mixing with the extratropics is faster. Lastly, in Fig. 5c and Fig. 6c we show the meridional mass flux anomalies at the edges of the tropical pipe, which is smaller during E shear periods (due to the reduced isentropic transport immediately above the tropopause), so that they result anti-correlated with the lifetime oscillations.

Although both models agree with the response of the lifetime to changes in stratospheric dynamics, some differences between the models are visible. First of all, as seen in Table 1, the average aerosol lifetime is different for the two models (12.1 months for ULAQ-CCM against 13.5 months for GEOS-Chem). This might be due to a series of factors, amongst those a different  $r_{eff}$  for the sulfate aerosol ( $0.62 \mu\text{m}$  in GEOS-Chem and  $0.78 \mu\text{m}$  in ULAQ-CCM, as equatorial LS values) and a different treatment of the aerosol microphysics itself (bulk approach with diagnosed effective radius in GEOS-Chem and explicitly calculated size distribution approach for ULAQ-CCM). The lifetime oscillations are also of different magnitude: in this case the difference might in part be explained by looking at the ULAQ-CCM results using the Base case circulation (i.e., with a CTM-like approach) (see 5b). The decreased amplitude of the sulfate lifetime oscillations when the Base case circulation is used in the G4 case originates from the missing aerosol radiative feedback on dynamics and the consequent lack of additional tropical upwelling due the stratospheric aerosol heating rates ( $w^*=0.22 \pm 0.12$  for the CCM approach and  $0.20 \pm 0.09$  for the CTM approach, as a 20-70 hPa equatorial mean). A 25% reduction is found for the tropical upwelling time variability expressed with the standard deviation of monthly mean values in the 2030-39 decade. Another reason for the decreased amplitude of the sulfate lifetime oscillations should be found in the missing impact on lower stratospheric horizontal eddy mixing of decreasing SSTs in G4 with respect to the Base case (see Vioni et al. (2017b)) ( $\Phi_V=2.55 \pm 0.56$  Tg-S/yr for the CCM approach and  $2.34 \pm 0.42$  Tg-S/yr for the CTM-like approach; again with a 25% reduction of the net poleward meridional sulfate mass flux, integrated vertically above the tropopause at the subtropical barriers).

The interannual variability of the sulfate lifetime is smaller in GEOS-Chem (0.3 months) than in ULAQ-CCM (1.2 months), but closer to the latter when the ULAQ model is operated in CTM mode (0.6 months), i.e., using the Base circulation for the

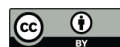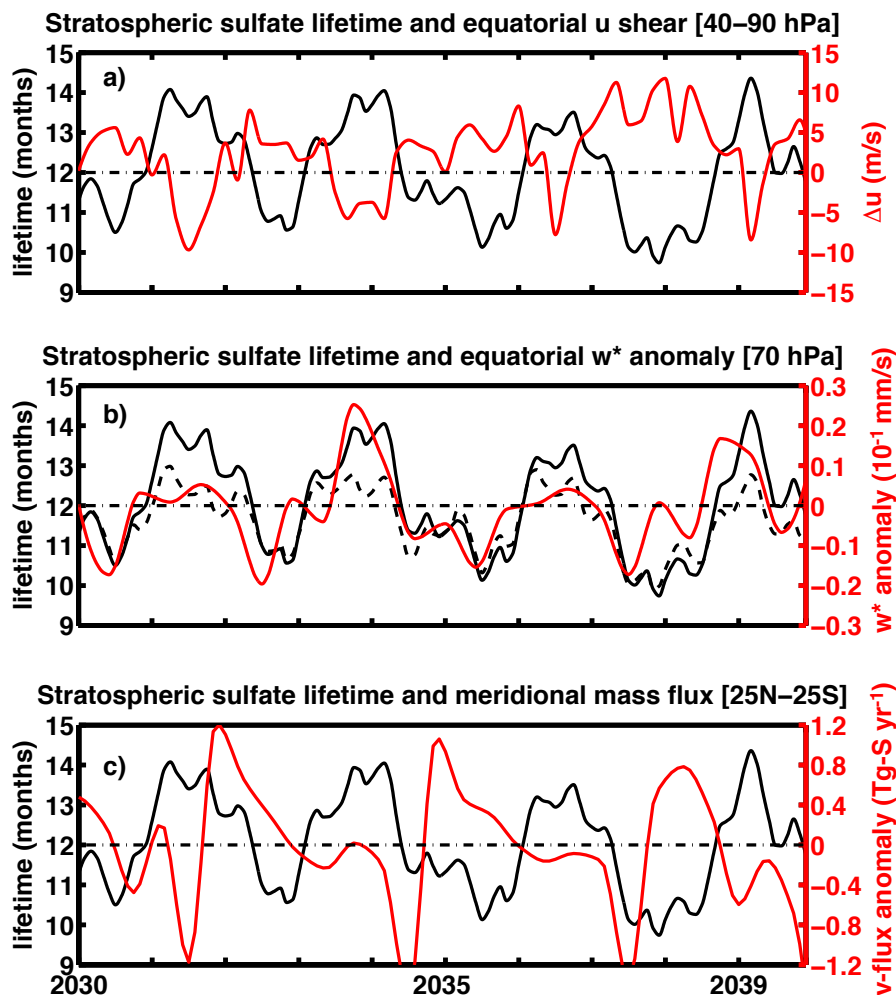

**Figure 5.** Panel (a): monthly means of geoengineering  $\text{SO}_4$  lifetime (black, left scale, months) and equatorial zonal wind shear between 40hPa and 90hPa (red, right scale, m/s) in the ULAQ-CCM (years 2030–2039). Panel (b):  $\text{SO}_4$  lifetime, as in panel (a), but compared against the 70 hPa equatorial  $w^*$  anomalies (red, right scale, mm/s). The calculated average lifetime of stratospheric sulfate from geoengineering sulfur injection of 8 Tg- $\text{SO}_2$ /yr is  $12.1 \pm 1.2$  months in ULAQ-CCM (with an equatorial residual vertical velocity  $w^* = 0.22 \pm 0.12$  mm/s, as an time average between 20 and 70 hPa). The average lifetime decreases to  $11.6 \pm 0.6$  months, when using winds from the baseline simulation, i.e., in a CTM approach (black dashed curve) (see text for discussion). Panel (c):  $\text{SO}_4$  lifetime, as in panel (a), but compared against the net poleward meridional sulfate mass flux anomalies integrated above the tropopause at the subtropical barriers at 25S and 25N (red, right scale, Tg-S/yr). The meridional flux is defined as  $v \times [\text{SO}_4]$  and defined positive when poleward, i.e.,  $\Phi_V = v[\text{SO}_4](25\text{N}) - v[\text{SO}_4](25\text{S})$ , where  $v$  is the meridional wind and  $[\text{SO}_4]$  the sulfate concentration ( $\Phi_V = 2.55 \pm 0.56$  Tg-S/yr).

G4 case, without including the aerosol radiative feedback on dynamics. The remaining difference is mainly connected with the different QBO treatment in the two models (assimilated wind fields for GEOS-Chem, nudged observed zonal winds in the

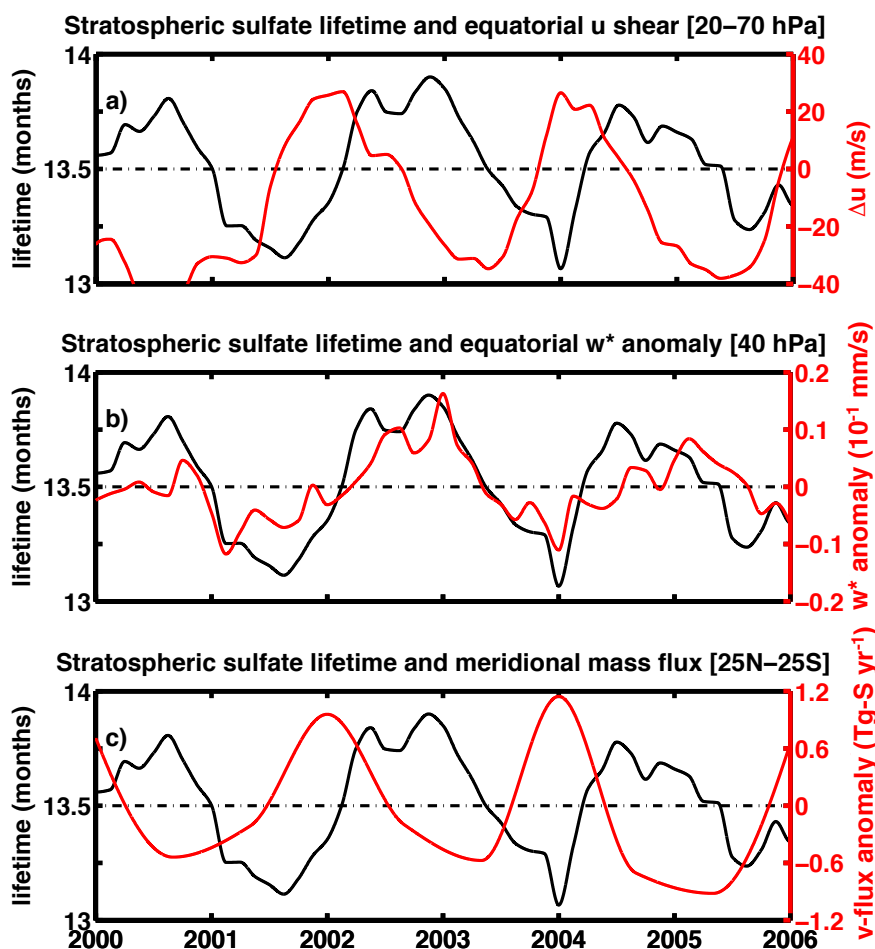

**Figure 6.** As in Fig. 5, but for GEOS-Chem for years 2000–2005. The calculated average lifetime of stratospheric sulfate from geoengineering sulfur injection of  $8 \text{ Tg-SO}_2/\text{yr}$  is  $13.5 \pm 0.3$  months in GEOS-Chem (equatorial residual vertical velocity  $w^* = 0.14 \pm 0.06 \text{ mm/s}$ , as a time average between 20 and 70 hPa; net poleward meridional sulfate flux out the tropical pipe  $\Phi_V = 2.31 \pm 0.38 \text{ Tg-S/yr}$ , as a time average at 25S and 25N latitude above the tropopause). The monthly variability of the sulfate lifetime (0.3 months) is smaller than in ULAQ-CCM (1.2 months), but closer to the latter when the ULAQ model is operated in CTM mode (0.6 months), i.e., using the Base circulation for the G4 case, without including the aerosol radiative feedback on dynamics (see text).

equatorial stratosphere for ULAQ-CCM) ( $w^* = 0.14 \pm 0.06 \text{ mm/s}$  and  $v = 2.31 \pm 0.38 \text{ Tg-S/yr}$  in GEOS-Chem, both defined as above for the ULAQ model). Additional 33% and 10% reductions of the time variability are found with respect to the ULAQ model operated in CTM mode, for tropical upwelling and the subtropical sulfate mass flux, respectively.

- 5 The link of QBO-driven transport oscillations with the sulfate aerosol particle size, already discussed in Fig. 4, is presented in Fig. 7, using ULAQ-CCM results. In Fig. 7a we show how a higher lifetime is connected to a larger tropical effective radius.

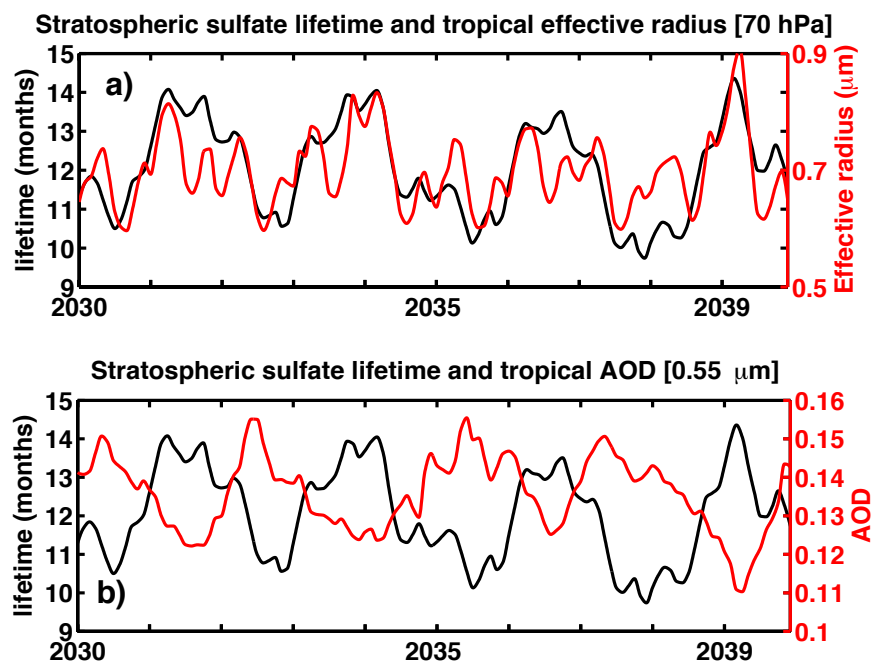

**Figure 7.** Panel (a): monthly means of geoengineering  $\text{SO}_4$  lifetime (black, left scale, months) and tropical effective radius at 70 hPa (red, right scale,  $\mu\text{m}$ ) (20S-20N) for ULAQ-CCM (years 2030-2039). Panel (b):  $\text{SO}_4$  lifetime, as in panel (a) and tropical aerosol optical depth at  $\lambda=0.55 \mu\text{m}$  (20S-20N). Average values in the 2030-2039 decade are:  $\text{reff} = 0.70 \pm 0.06 \mu\text{m}$ , tropical AOD =  $0.136 \pm 0.010$ , global AOD =  $0.079 \pm 0.003$ . The calculated all-sky tropopause-adjusted radiative forcing from stratospheric geoengineering sulfate (G4-Base) is  $-1.73 \pm 0.07 \text{ W/m}^2$  (shortwave),  $+0.53 \pm 0.02 \text{ W/m}^2$  (longwave) and  $-1.20 \pm 0.05 \text{ W/m}^2$  (net). The E-W shear average anomaly of the net RF is calculated to be  $+0.06 \text{ W/m}^2$  (i.e., when the lifetime is longer, there is an average 5% decrease of the long-term calculated net RF).

This is a consequence of what we showed in Fig. 5b, with the lifetime being higher under an E shear, when  $w^*$  presents positive anomalies and  $\Phi_V$  negative anomalies. As discussed in Fig. 4, a higher tropical confinement favors the enhancement of micro-physical processes responsible for particle growth (gas condensation and coagulation). In Fig. 7b we show that this increased particle size produces in turn a smaller tropical AOD at  $\lambda=0.55 \mu\text{m}$ , due to a decreased scattering efficiency of the sulfate particles themselves. This is because the extinction coefficient at  $0.55 \mu\text{m}$  varies greatly around the maximum and minimum values of the radii shown in Fig. 7a, with a peak closer to the values found under a W shear. This result appears to be in line with the findings of Niemeier and Schmidt (2017) regarding particle growth under different QBO wind shears and its effect on AOD and forcing efficiency (although in their case the QBO reacted to sulfate injection and their  $\text{SO}_2$  injection was larger with respect to the one adopted in the present study).

10

Lastly, we show in Fig. 8 how the oscillations in the stratospheric sulfate lifetime are correlated with changes in sulfur ground deposition. In order to avoid masking the interannual variability of surface deposition with the seasonal component, a

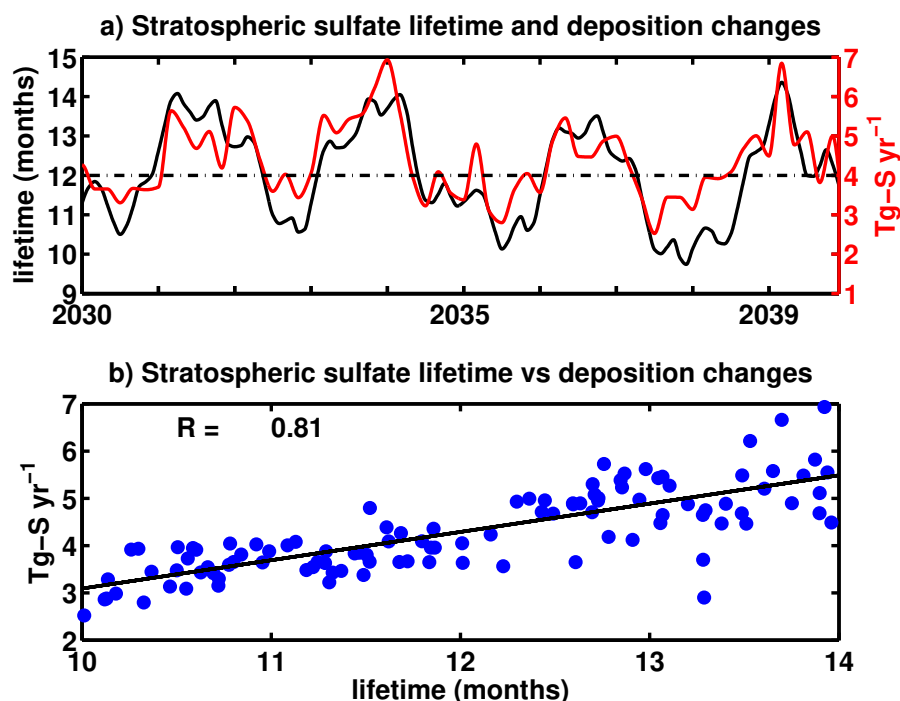

**Figure 8.** Panel (a): monthly means of geoengineering  $\text{SO}_4$  lifetime (black, left scale, months) and sulfur deposition changes (G4-Base) (red, right scale,  $\text{Tg-S/yr}$ ) for ULAQ-CCM (years 2030–2039). To highlight the correlation between the stratospheric  $\text{SO}_4$  lifetime and the sulfate deposition, the monthly values of the latter have been treated as follows: 1) an annual mean cycle was first calculated over the whole decade; the annual variability was then removed, in order to keep the interannual variability alone; 2) detrended monthly deposition values were finally shifted ahead by 8 months. This latter value was chosen for optimizing the correlation and is close the average time needed for G4 aerosols formed in the stratospheric tropical pipe to reach the tropopause, where they are exchanged with the troposphere and finally lost by surface deposition. Panel (b): scatter plot of the values presented as time series in panel (a) (0.81 correlation coefficient). A comparable behavior is also found in the GEOS-Chem results (not shown), with a 0.92 correlation between monthly values of the stratospheric sulfate lifetime and detrended monthly deposition values with 8 months lag.

detrending method has been applied to retain only interannual changes. Furthermore, the deposition values have been shifted by 8 months, in order to show how the stratospheric sulfate lifetime is well correlated with the deposition changes (G4-Base) after the time needed for the particles in the tropical pipe to reach the tropopause. We have estimated this time close to 8 months, considering both isentropic transport out of the tropical pipe and settling of the particles from the height at which they are produced down to the tropical tropopause. The scatter plot in Fig. 8b shows the good correlation of the stratospheric sulfate lifetime (on monthly basis) with detrended and time-shifted deposition change values.



## 4 Sulfur deposition

In the previous section, the physical mechanisms regulating the stratospheric sulfate mean distribution and abundance have been discussed, along with its interannual variability under SG conditions. Fig. 8 has proven that interannual oscillations in large scale stratospheric transport not only regulate the integrated sulfate mass above the tropopause (i.e., the SG lifetime), but also the globally integrated surface deposition changes of sulfur. In this section we analyze, both globally and on continental scale, how SG surface deposition is regulated by cross tropopause downward fluxes. We will also evaluate the model calculated background surface deposition of sulfur and quantify absolute and relative deposition changes due to SG, looking also at the QBO-driven variability of the deposition.

### 4.1 Global-scale time-average deposition

The model calculated zonally averaged sulfur deposition in baseline conditions is presented in Fig. 9a: as expected from the short tropospheric sulfur lifetime ( $\sim 5$  days for  $\text{SO}_4$  and  $1\div 2$  days for  $\text{SO}_2$  and DMS) and from the model-consistent global and regional sulfur emission fluxes (see Tables 1-3), the annually and zonally averaged sulfur deposition (dry+wet,  $\text{SO}_2+\text{SO}_4$ , Base case) does not show significant departures between GEOS-Chem and ULAQ-CCM. Following the latitudinal pattern of anthropogenic fossil fuel  $\text{SO}_2$  emissions, most of the background deposition is confined to the NH mid-latitudes, producing a large interhemispheric asymmetry.

Annually and zonally averaged sulfur deposition changes due to SG (i.e., G4-Base) are presented in Fig. 9b. Here a significant difference between the two models is visible: deposition changes in ULAQ-CCM peak at the subtropics up to approximately  $45^\circ$  latitude in both hemisphere ( $\sim 15 \text{ mg-S m}^{-2} \text{ yr}^{-1}$ ), with smaller values in the tropics ( $\sim 4 \text{ mg-S m}^{-2} \text{ yr}^{-1}$ ), which reflects the large-scale STE latitudinal pattern, coupled to the cross-tropopause aerosol sedimentation flux. The deposition change peak in the NH is larger than in the SH by approximately 50%, consistently with the larger stratospheric poleward flux at the NH tropical barrier ( $1.66 \text{ Tg-S/yr}$ ), with respect to the SH ( $0.89 \text{ Tg-S/yr}$ ) (see Fig. 3). On the other hand, GEOS-Chem predicts a flatter distribution of the zonally averaged sulfur deposition, from the subtropics equatorwards, in both hemispheres. This is again consistent with what shown in Fig. 3, regarding both the tropical sulfur downward flux at the tropopause and the upper tropospheric equatorward horizontal mixing at the subtropics. Both are larger in GEOS-Chem with respect to ULAQ-CCM and mainly for the tropical sulfur influx due to tropospheric horizontal mixing.

The large scale sulfate transport behavior in GEOS-Chem results from downward fluxes at the subtropical tropopause with further downward motion in the troposphere coupled to a significant equatorward component. This is consistent with analyses of the ozone STE made by Hsu et al. (2005), using the University of California at Irvine (UCI) chemistry-transport model. The tropospheric equatorward transport component in the ULAQ-CCM is much weaker, so that the integrated tropical sulfur deposition flux in this model ( $1.67 \text{ Tg-S/yr}$ ) results to be significantly smaller than in GEOS-Chem ( $2.53 \text{ Tg-S/yr}$ ). Nevertheless,

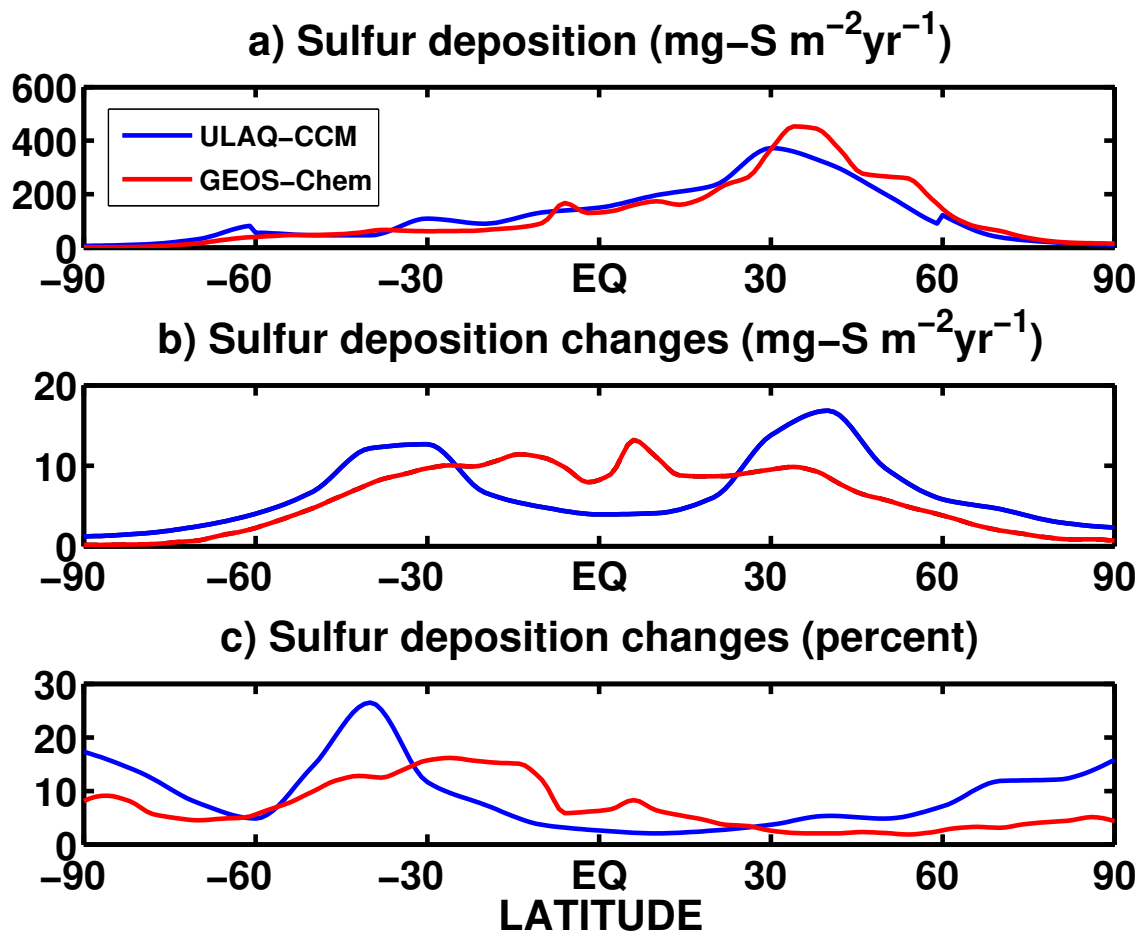

**Figure 9.** Panel (a): zonally-annually averaged sulfur deposition fluxes in the baseline experiment ( $\text{mg-S m}^{-2}\text{ yr}^{-1}$ ), for ULAQ-CCM (blue, years 2030-2039) and GEOS-Chem (red, years 2000-2005). Panel (b): as in panel (a), but for the sulfur deposition flux changes (G4-Base). Panel (c): as in panel (b), but in percent of the Base case.

some of the model results presented in Marshall et al. (2017) for the Tambora eruption case, highlight distinct sulfur deposition maxima over the mid-latitudes, with limited sulfate penetration in the tropical band.

Sulfur deposition changes due to SG are further highlighted in Fig. 9c, where the increased deposition is shown in percent of the Base case. In the NH the increase is typically much less than 10% (except over the Arctic for ULAQ-CCM), whereas in the SH the deposition increase ranges between 10% and 20%, with a 27% peak for ULAQ-CCM around 40S. The interhemispheric asymmetry is largely produced by the much larger NH deposition of tropospheric sulfur (Fig. 9a).



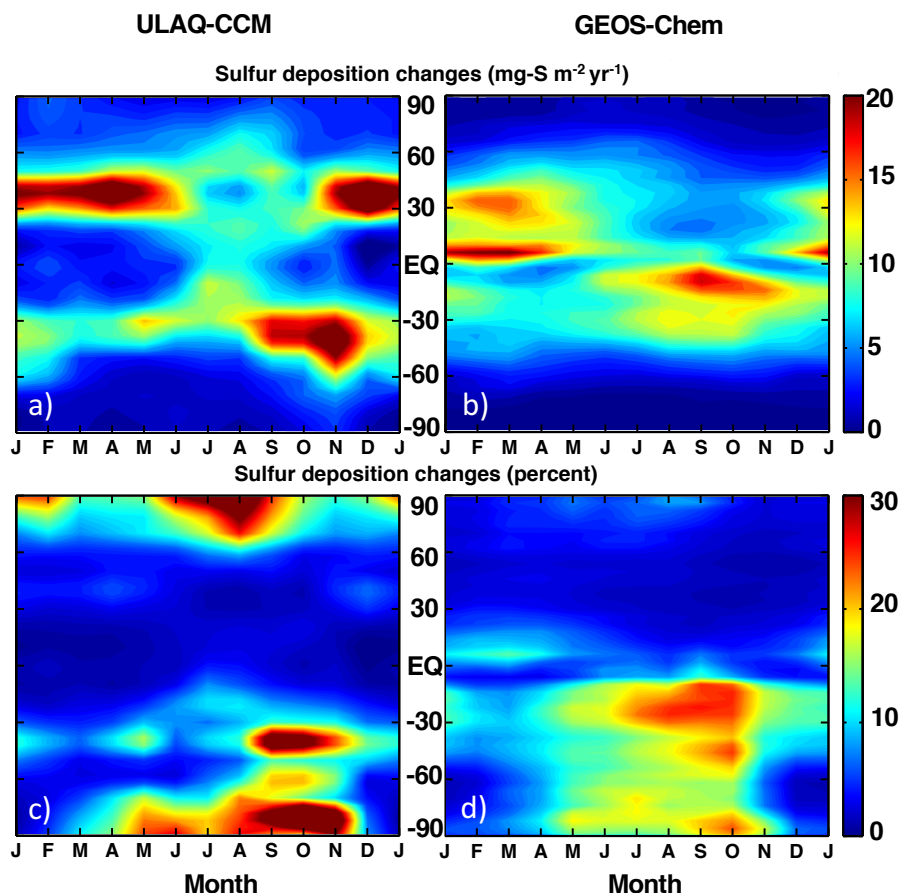

**Figure 10.** Zonally averaged sulfur deposition flux changes (G4-Base), as a function of latitude and months, for ULAQ-CCM in panels (a,c) (years 2030-2039) and GEOS-Chem in panels (b,d) (years 2000-2005). Panels (a,b) show absolute changes ( $\text{mg-S m}^{-2} \text{yr}^{-1}$ ); panels (c,d) show percent changes with respect to the Base case.

Looking at the zonally averaged season-dependent sulfur deposition (Fig. 10ab), it is easy to find the signature of sub-tropics and mid-latitude cross-tropopause stratospheric influx. As well documented for ozone (Hsu et al. (2005)), as an example for an atmospheric tracer with stratospheric reservoir, the STE reaches maximum values during springtime months at the sub-tropics, close to  $30^\circ$  latitude in both hemispheres. The correlation of sub-tropics and mid-latitude monthly maxima of the STE with sulfur deposition maxima is observed in both models, with additional near-equatorial maxima in GEOS-Chem, due to a more efficient upper tropospheric horizontal mixing in this model (see discussion on Fig. 2c and Fig. 9b). The STE  $\text{O}_3$  flux diagnosed in Hsu et al. (2005) shows a significant subtropical influx most of the year, with mid-latitude influx important only in spring and summer in the NH. They also note that the STE  $\text{O}_3$  flux generally travels further downwards in the troposphere with a significant equatorward component, which is in agreement with the GEOS-Chem findings of a larger equatorward tropospheric



mixing of stratospheric sulfate coming from the subtropical STE (as already noted above in the discussion of Fig. 9). Sulfur deposition changes relative to atmospheric unperturbed conditions (Fig. 10cd) are also consistent in the two models, except over the Arctic, where the ULAQ-CCM predicts a significantly larger impact of the SG sulfur deposition with respect to the Base case, pointing out to a stronger polar descent (also visible in Fig. 9bc).

5

Annually averaged sulfur deposition flux changes are shown in Fig. 11, as a function of latitude and longitude. The effects of the tropical sulfate influx in the upper troposphere are clear in the GEOS-Chem deposition fields (Fig. 11bd), when compared to those of ULAQ-CCM (Fig. 11ac). In the latter case, a significant tropical deposition is only predicted over south-east Asia (in absolute values). Mid-latitude maxima, on the other hand, are rather consistent between the two models, as well visible in the SH percent changes (Fig. 11cd). Non-zonal asymmetries of mid-latitude deposition flux changes result essentially from planetary wave modulation of the strat-trop downward flux, coupled to the precipitation frequency in the lower troposphere (see discussion below). Sulfur deposition changes in the polar regions are of the same order of magnitude in the two models only over Antarctica ( $5 \div 12\%$  in GEOS-Chem and  $10 \div 20\%$  in ULAQ-CCM). The Arctic increase, on the other hand, is much larger in the ULAQ-CCM, with a peak of 35% east of Greenland; as already noted in the discussion of Fig. 10, this is most likely related to a stronger polar descent in the ULAQ-CCM.

Mid-latitude maxima also appear to be consistent with the findings of Marshall et al. (2017), regarding the latitude-longitude distribution of sulfate deposition after the Tambora eruption in 1815, as simulated by four Atmosphere-Ocean Global Circulation Models (AOGCMs). Although a one to one comparison is not possible, because an impulsive rather than sustained tropical  $\text{SO}_2$  injection is considered in the aforementioned study, similarities can be found with the spatial distribution of sulfate presented in Fig. 10 and Fig. 11.

## 4.2 QBO impact on global-scale deposition

In order to highlight the role of SG strat-trop downward fluxes on non-zonal asymmetries of the mid-latitude deposition flux changes presented in Fig. 11a, we show in Fig. 12a the time averaged G4-Base changes of the downward cross-tropopause sulfur flux, for the ULAQ-CCM. Its maxima resemble a planetary wavenumber 1-2 modulation of the lower stratospheric poleward sulfate transport from the tropical pipe reservoir, thus consequently producing non-zonal asymmetries in the tropospheric sulfate influx. The tropospheric convective vertical mixing coupled to wet scavenging produces a tropospheric sulfate lifetime of approximately 5 days in the ULAQ-CCM (Pitari et al. (2016a)). In a first approximation, zonal transport operated by the westerlies tends to move the downward moving sulfate coming from the tropopause by approximately 6500 km in a time period comparable to the tropospheric sulfate lifetime. This seems roughly consistent with the westerly displacement of mid-latitude sulfur deposition flux changes of Fig. 11a with the strat-trop sulfur downward fluxes of Fig. 12a.

As summarized in Fig. 3, the latitudinal distribution of sulfur deposition is regulated by the cross-tropopause downward fluxes due to both large scale STE in the lower branch of the Brewer-Dobson circulation and by gravitational settling of the

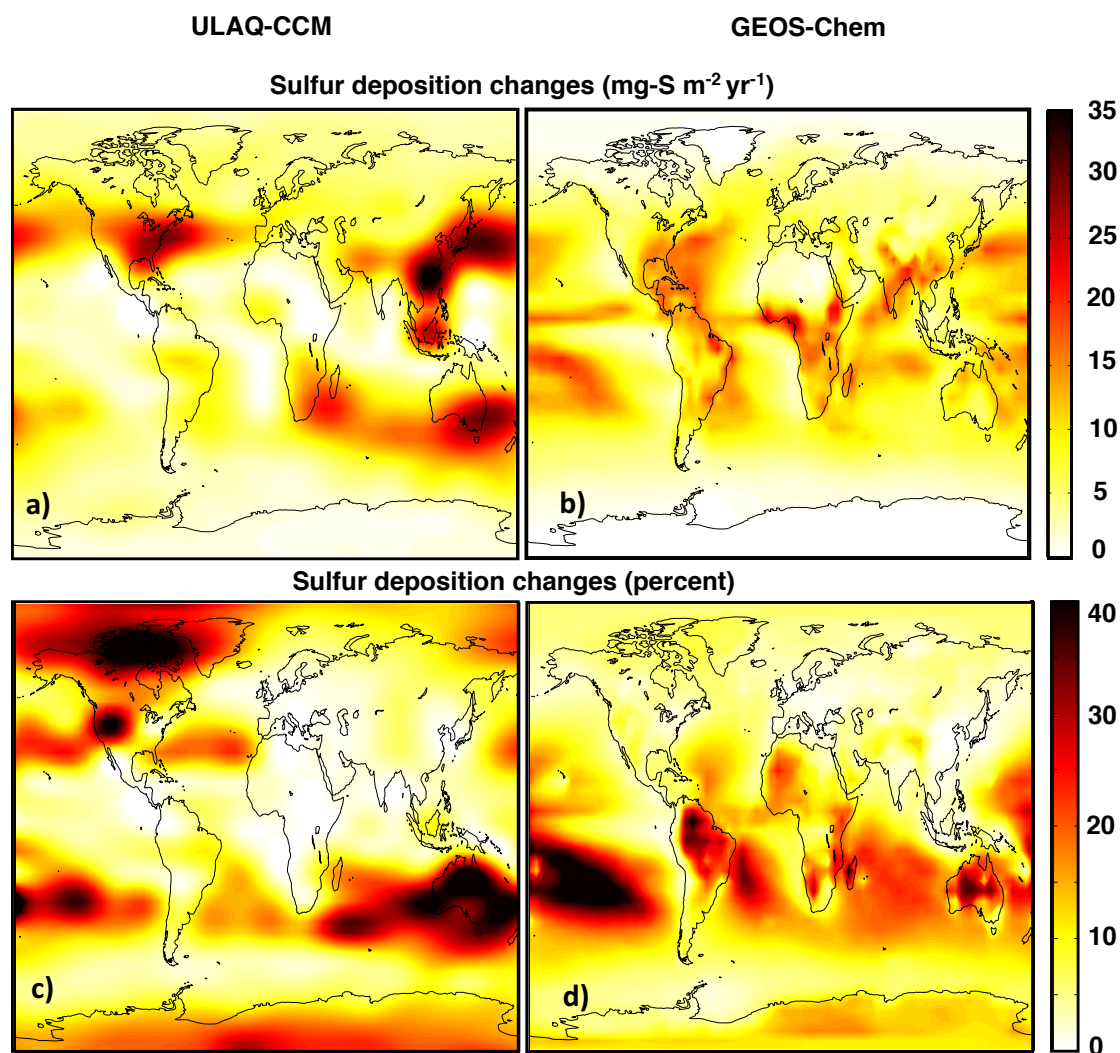

**Figure 11.** Annually averaged sulfur deposition flux changes (G4-Base), as a function of latitude and longitude, for ULAQ-CCM in panels (a,c) (years 2030-2039) and GEOS-Chem in panels (b,d) (years 2000-2005). Panels (a,b) show absolute changes ( $\text{mg-S m}^{-2} \text{ yr}^{-1}$ ); panels (c,d) show percent changes with respect to the Base case.

aerosol particles. The latter may be significantly modulated by the changing aerosol size distribution during different QBO phases, mainly in the tropical region (see Fig. 4 and Fig. 7). The former is also modulated by the QBO, as discussed and summarized in Fig. 4 and proved in Fig. 5-6 for both ULAQ-CCM and GEOS-Chem, with the net effect discussed in Fig. 8 for the ULAQ-CCM.

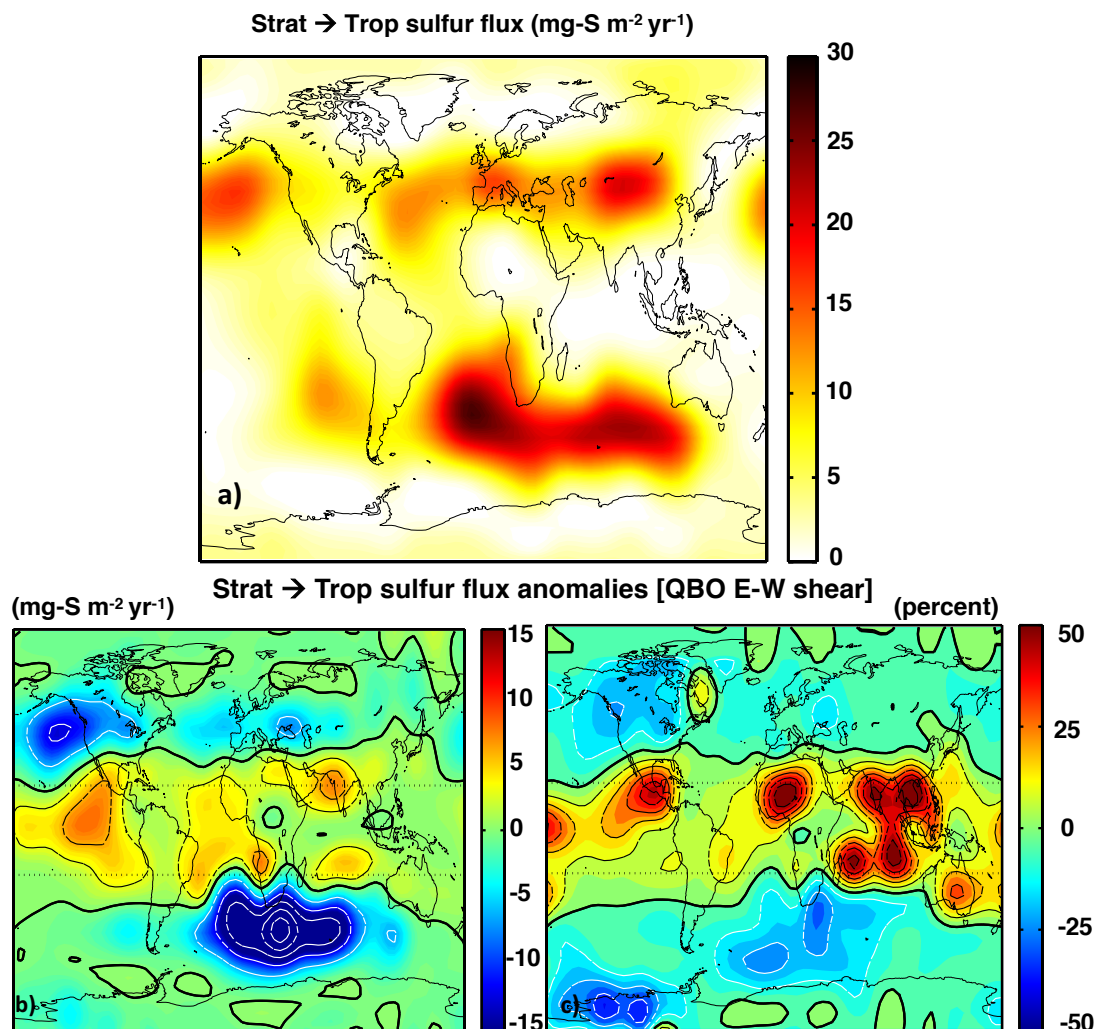

**Figure 12.** Panel (a): downward cross-tropopause sulfur flux changes (G4-Base) in ULAQ-CCM, as a function of latitude and longitude and averaged over years 2030-2039 ( $\text{mg-S m}^{-2} \text{yr}^{-1}$ ). Panels (b,c): as in (a), but showing differences between years with QBO easterly shear and years with QBO westerly shear; panel (b) shows the difference is in absolute units ( $\text{mg-S m}^{-2} \text{yr}^{-1}$ ), whereas panel (c) shows the difference in percent of the decadal averaged flux changes presented in panel (a). Positive and negative anomalies are separated by the thick black curve (zero contour line); thin black/white curves show positive/negative contours with step of  $5 \text{ mg-S m}^{-2} \text{yr}^{-1}$  in panel (b) and 10% in panel (c); dotted lines highlight the subtropical barriers at  $25^\circ\text{N}$  and  $25^\circ\text{S}$ . Integrated S-flux anomalies (QBO E-W shear) are as follows; tropics:  $+0.61 \text{ Tg-S/yr}$  (+42%); NH:  $-0.51 \text{ Tg-S/yr}$  (-31%); SH:  $-0.35 \text{ Tg-S/yr}$  (-39%); global:  $-0.25 \text{ Tg-S/yr}$  (-6%)

The QBO important role in modulating the poleward isentropic transport of sulfate from the tropical pipe reservoir (and consequently the extra-tropical strat-trop downward flux of sulfur) can be clearly highlighted by showing in Fig. 12bc the



equivalent of Fig. 12a, but in terms of QBO E-W shear anomalies of the cross-tropopause sulfur fluxes. Under an E shear the tropical confinement is increased, resulting in both a reduction of the lower stratospheric isentropic transport toward the mid-latitudes and an increase of tropical particle size, because of the larger amount of sulfate mass concentration in the tropical pipe. Fig.12b shows that the combination of these two factors modify the cross-tropopause sulfur fluxes between E shear and

5 W shear periods of the QBO, by increasing the downward flux in the tropics (for the larger aerosol settling velocities) and decreasing it in the extra-tropics due to reduced poleward isentropic transport. This is further highlighted in Fig. 12c where the differences are drawn in percent of the decadal average presented in Fig. 12a. The integrated positive tropical difference (+42%) is larger with respect to each of the integrated negative extra-tropical differences (-31% in the NH and -39% in the SH). The net E-W globally integrated flux anomaly, however, is negative (-0.25 Tg-S/yr, i.e., -6%), consistently with the strato-

10 spheric sulfate lifetime oscillations shown in Fig. 5.



### 4.3 Continental-scale deposition

The last part of the present work is dedicated to analyzing the sulfur deposition changes due to SG on continental scale. To do so, we first present in Fig. 13 an evaluation of the Base emission and deposition fluxes over land and over oceans for both models, using available literature: in particular, we compared our results with Vet et al. (2014), that uses a multi-model plus observation approach, and Lamarque et al. (2013) who rely on a multi-model approach. In particular, the former work allows us to compare emission and deposition fluxes in all land and oceanic regions of the planet, whereas the latter offers regional values for land regions (except Antarctica). The regions are ordered from the southernmost to the northernmost, in order to highlight inter-hemispheric differences, if present. From Fig. 13ab we can see that both models correctly reproduce emission fluxes at a regional level, with the correct order of magnitude almost everywhere, both on land and oceans. A significant model spread is found over Antarctica, where ULAQ-CCM overestimates the Vet et al. (2014)) estimate, contrary to GEOS-Chem, which on the other hand underestimate it. The deposition values presented in Fig. 13ab are equally, if not even more, consistent with Vet et al. (2014) values.

Once sure that both models properly simulate emission and deposition fluxes, we have estimated the amount of increased deposition on all regions, produced by the 4 Tg-S/yr injection in the equatorial lower stratosphere. These results are shown in Table 5 and its equivalent graphical form in Figure 14. The standard deviation given for both models in each region represent the inter-annual variability due to the QBO, as explained in Fig. 8. As already highlighted in Fig. 9, the two models differ in their estimate of the increased sulfur deposition in the tropics, with GEOS-Chem giving a significantly larger deposition change over Africa. As it has been shown in Fig. 3, this is a result of both the larger cross-tropopause tropical downward flux and the larger mid-upper tropospheric mixing toward tropical latitudes in GEOS-Chem compared to ULAQ-CCM (see also the discussion relative to Fig. 9-11). When looking at Fig. 14cd we see that this translates in a much larger relative deposition change over Africa for GEOS-Chem with respect to ULAQ-CCM.

Considering the imbalance of Base deposition fluxes between SH and NH (Fig. 13), we obtain relative changes in Fig. 14cd that appear much smaller in the NH (as a whole, an increase of 3.8% of the Base deposition) compared to SH values (as a whole, an increase of 10.3% of the Base deposition). This means that over some regions in the SH, the sulfur deposition increases by more than 10% (Oceania and South America for ULAQ-CCM, with 10.6% and 10.1%). A rather large difference is also present in percent changes over the Arctic Ocean, with a  $14.7 \pm 2.2\%$  for ULAQ-CCM compared to a  $2.3 \pm 0.3\%$  for GEOS-Chem, a difference already shown and discussed in Fig. 9.



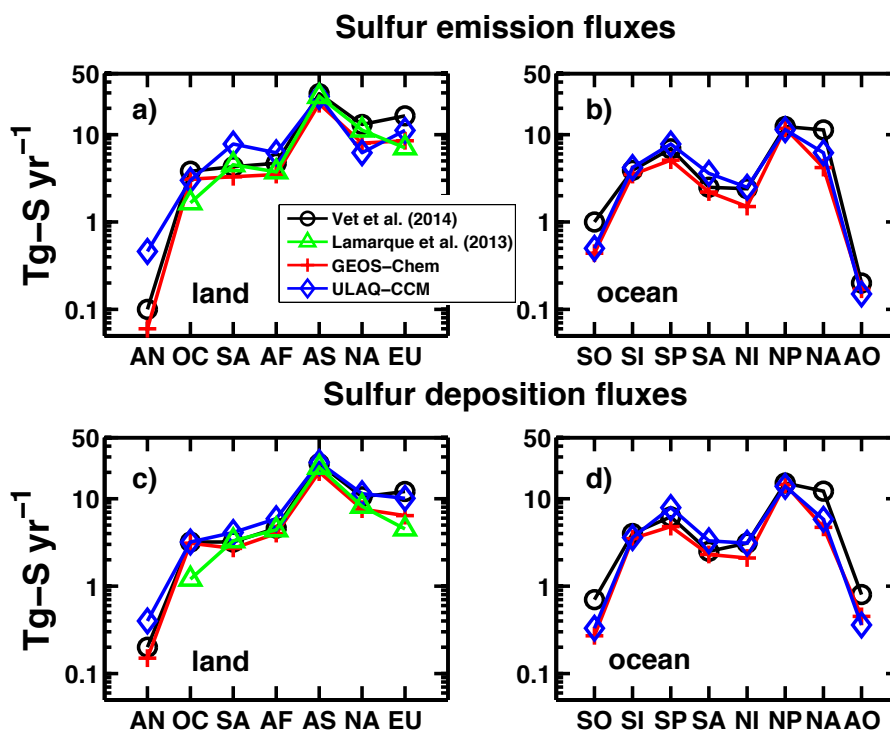

**Figure 13.** Regional area averaged emission and deposition fluxes of sulfur, in panels (a,b) and (c,d), respectively. Values from ULAQ-CCM (blue) and GEOS-Chem (red) are averaged over years 2000-2002 (i.e., historical reference experiment for ULAQ-CCM and Base case for GEOS-Chem). Observations and multi-model averages reported in Vet et al. (2014) and Lamarque et al. (2013) are shown for comparison (years 2001 and 2000, respectively). Land regions are presented in panels (a,c) (Antartica, Oceania, South America, Africa, Asia, North America, Europe); ocean regions are presented in panels (b,d) (Southern Ocean, South Indian, South Pacific, South Atlantic, North Indian, North Pacific, North Atlantic, Arctic Ocean).





**Table 5.** a) Area integrated sulfur deposition changes for continental regions in the geoengineering G4 case, with respect to the unperturbed Base case: ULAQ-CCM [2030-2039]; GEOS-Chem [2000-2005]. b) As in a), but for the oceans. The standard deviation in each region represents the inter-annual variability due to the QBO.

| Region         | GEOS-Chem<br>[G4-Base]<br>(Tg-S/yr) | ULAQ-CCM<br>[G4-Base]<br>(Tg-S/yr) | GEOS-Chem<br>[G4-Base]<br>(%) | ULAQ-CCM<br>[G4-Base]<br>(%) |
|----------------|-------------------------------------|------------------------------------|-------------------------------|------------------------------|
| a)             |                                     |                                    |                               |                              |
| Antarctica     | 0.01 ± 0.00                         | 0.03 ± 0.01                        | 7.1 ± 0.7                     | 8.2 ± 0.6                    |
| Oceania        | 0.20 ± 0.02                         | 0.34 ± 0.02                        | 6.9 ± 0.7                     | 10.6 ± 0.6                   |
| South America  | 0.20 ± 0.03                         | 0.28 ± 0.05                        | 7.9 ± 1.2                     | 10.1 ± 1.7                   |
| Africa         | 0.44 ± 0.07                         | 0.08 ± 0.05                        | 11.0 ± 1.8                    | 2.1 ± 1.3                    |
| Asia           | 0.32 ± 0.03                         | 0.48 ± 0.19                        | 1.5 ± 0.2                     | 2.7 ± 1.1                    |
| North America  | 0.21 ± 0.01                         | 0.42 ± 0.02                        | 2.8 ± 0.1                     | 5.5 ± 0.3                    |
| Europe         | 0.12 ± 0.01                         | 0.17 ± 0.06                        | 1.6 ± 0.2                     | 2.5 ± 0.9                    |
| Total Land     | 1.5 ± 0.5                           | 1.8 ± 0.9                          | 3.4 ± 1.4                     | 4.7 ± 1.9                    |
| b)             |                                     |                                    |                               |                              |
| Southern Ocean | 0.01 ± 0.01                         | 0.02 ± 0.01                        | 3.8 ± 0.8                     | 7.7 ± 1.8                    |
| South Indian   | 0.37 ± 0.11                         | 0.41 ± 0.05                        | 10.9 ± 1.3                    | 12.2 ± 3.3                   |
| South Pacific  | 0.70 ± 0.32                         | 0.63 ± 0.17                        | 14.2 ± 2.7                    | 12.2 ± 3.3                   |
| South Atlantic | 0.36 ± 0.13                         | 0.13 ± 0.03                        | 11.9 ± 2.6                    | 5.8 ± 1.5                    |
| North Indian   | 0.12 ± 0.04                         | 0.13 ± 0.03                        | 5.0 ± 0.8                     | 4.3 ± 1.6                    |
| North Pacific  | 0.67 ± 0.48                         | 0.63 ± 0.21                        | 5.0 ± 1.3                     | 6.8 ± 2.1                    |
| North Atlantic | 0.26 ± 0.05                         | 0.20 ± 0.03                        | 6.8 ± 0.5                     | 5.2 ± 0.9                    |
| Arctic Ocean   | 0.01 ± 0.01                         | 0.03 ± 0.01                        | 2.3 ± 0.3                     | 14.7 ± 2.2                   |
| Total Ocean    | 2.5 ± 1.1                           | 2.2 ± 1.2                          | 7.7 ± 2.4                     | 7.8 ± 2.9                    |

Although the deposition change value predicted by the ULAQ-CCM over the Arctic might seem much too large compared to GEOS-Chem, when looking at the absolute values an (albeit imperfect) comparison can be drawn with the values presented in Marshall et al. (2017), regarding the sulfur deposition over Antarctica and Greenland, as simulated by four AOGCMs after the Tambora eruption. If we scale the Tambora emission of 60 Tg-SO<sub>2</sub> to our 8 Tg-SO<sub>2</sub> SG scenario, we obtain for those four models a spread in the simulated deposition that ranges between 0.008 to 0.05 Tg-S for Greenland and from 0.03 to 0.47 Tg-S for Antarctica, against an estimated deposition from ice-cores (Sigl et al. (2015); Gao et al. (2007)) of 0.013 Tg-S for Greenland and 0.09 Tg-S for Antarctica (again, linearly scaling the results from 60 Tg-SO<sub>2</sub> to 8 Tg-SO<sub>2</sub>). The ULAQ-CCM estimated deposition in the two areas (0.011 Tg-S/yr for Greenland and 0.03 Tg-S/yr for Antarctica) fit inside the multi-model range in Marshall et al. (2017) and actually come close to estimated (scaled) values from ice cores in the two areas, compared to the values of GEOS-Chem (0.004 Tg-S/yr for Greenland and 0.01 Tg-S/yr for Antarctica), which appear to be much lower. However, considering that such a large volcanic injection of SO<sub>2</sub> had certainly produced a different size distribution of stratospheric sulfate aerosols with respect to the one considered in the present SG experiment, a simple linear scaling of the emission may result rather inappropriate, allowing nothing more than an order of magnitude comparison between these results.

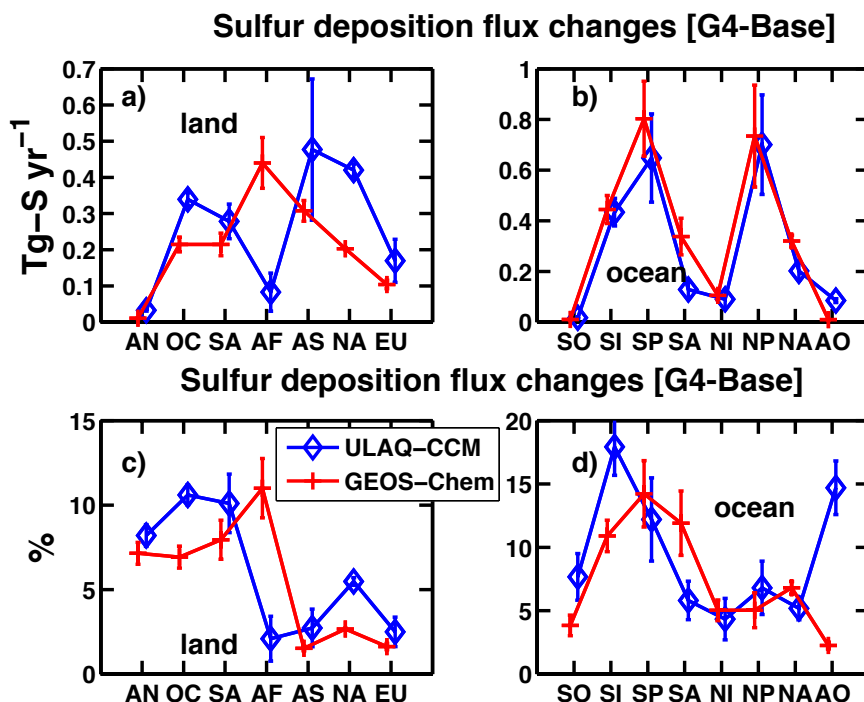

**Figure 14.** Regional area averaged deposition flux changes of sulfur (G4-Base) for land and ocean regions, in panels (a,c) and (b,d), respectively. Regions are those listed in Fig. 13. Absolute changes are shown in panels (a,b) ( $\text{Tg-S/yr}$ ); percent changes with respect to the Base case are shown in panels (c,d). Whiskers show the standard deviation of detrended monthly deposition change values, for years 2030-2039 in ULAQ-CCM and 2000-2005 in GEOS-Chem (annual variability is removed, as explained in Fig. 8, to highlight the impact on surface deposition changes of the stratospheric circulation interannual variability, mainly due to the QBO).

Lastly, in Fig. 15 we show the regional deposition percent changes, highlighting the standard deviation due to both seasonal and interannual changes (darker shading for the latter, same as shown in Fig. 14). This visual representation allows to see that, when looking at single deposition change values, there might be a combination of seasonal and QBO-driven effects that may produce a variability of relative deposition changes with an upper limit as high as 15% over Africa for GEOS-Chem, or as low as close to zero over Africa and Asia for ULAQ-CCM.

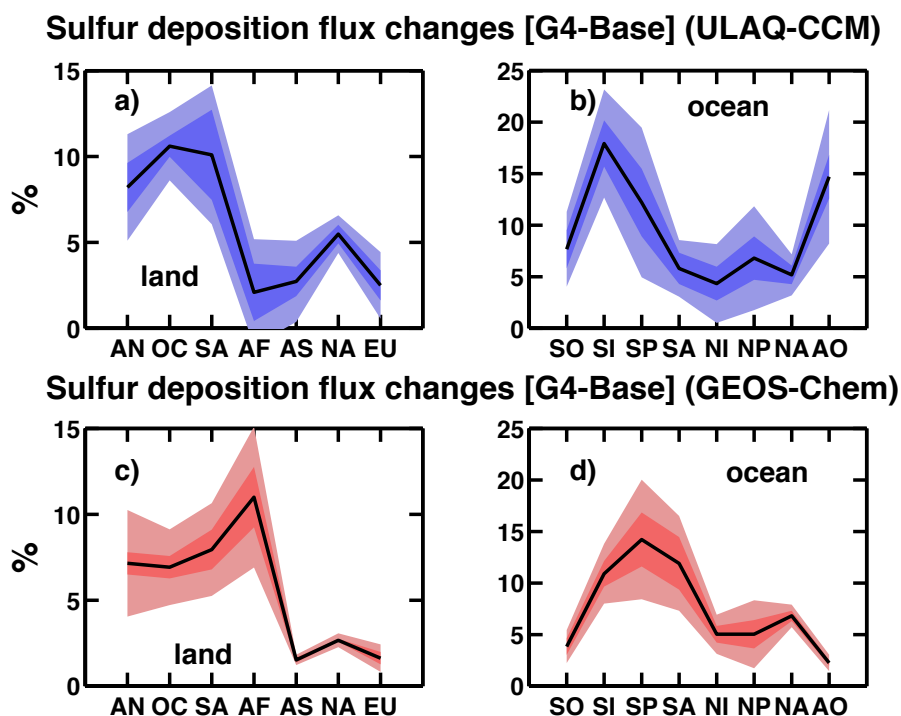

**Figure 15.** Regional area averaged deposition flux changes of sulfur (G4-Base) for land and ocean regions, in panels (a,c) and (b,d), respectively. Regions are those listed in Fig. 13. Percent changes from ULAQ-CCM are shown in panels (a,b); those from GEOS-Chem are in panels (c,d) (both respect to the Base experiment). Shaded areas (blue for ULAQ-CCM and red for GEOS-Chem) show the standard deviation of monthly deposition percent change values, for years 2030-2039 in ULAQ-CCM and 2000-2005 in GEOS-Chem. Darker blue/red shaded areas show the standard deviation for detrended monthly deposition change values (with annual variability removed, as explained in Fig. 8 and specified in Fig. 14).



## 5 Conclusions

The main goal of geoengineering is to reduce our planet surface warming, bound to happen if the amount of GHGs is not reduced via cuts on anthropogenic emissions (IPCC (2013)). In the case of SG, the main effect of cooling the planet could surely be achieved, and we are assured on that by both looking at explosive volcanic eruption and their effect on climate and on many results from the GeoMIP project, coming from a vast array of simulations from independent models (Kravitz et al. (2011); Vioni et al. (2017a)). However, in terms of possible side effects there is much still left to study and understand. In this study we focused on the SG impact on the surface deposition of sulfur, in case of an injection of 8 Tg-SO<sub>2</sub>/yr simulated in two global-scale models, ULAQ-CCM and GEOS-Chem. Results from these simulations tell us that the stratospheric SO<sub>4</sub> lifetime is highly correlated with the QBO phase (as already found in Pitari et al. (2016b) for explosive volcanic eruptions).

When the westerly phase is localized in the lower stratosphere (i.e., with an E shear of the equatorial mean zonal winds), the stratospheric SO<sub>4</sub> lifetime is found to increase in the ULAQ-CCM by up to 4 months, with respect to the lifetime under a QBO easterly phase localized in the lower stratosphere (i.e., with a W shear of the equatorial mean zonal winds). This happens for two reasons: with an E shear, the horizontal isentropic transport of sulfate out of the tropical pipe is slower and the tropical upwelling is enhanced at all vertical layers (Trepte and Hitchman (1992)), thus allowing for a longer stratospheric residence time of the aerosols. This is the net result of two competing effects: less extratropical strat-trop exchange is allowed during the E wind shear and overcompensates for an increasing tropical sedimentation of the sulfate particles, which may grow larger with an enhanced sulfur confinement in the tropical pipe.

A limitation of this study is the use of an assimilated or nudged QBO, for both GEOS-Chem and ULAQ-CCM. This means that changes of QBO amplitude and periodicity due to aerosol radiative effects connected with SG conditions cannot be seen, as instead evidenced and discussed in Aquila et al. (2014), Niemeier and Timmreck (2015) and Niemeier and Schmidt (2017). In a way, this does not allow to draw any broad conclusions regarding the final effect that the mutual interactions of aerosol size distribution, heating rate changes and QBO have on each other (the complex 'balance' shown in Fig. 4). In another way, constraining some of the degrees of freedom does allow us to answer some compelling scientific questions regarding the uncertainties of sulfate geoengineering (MacMartin et al. (2016)).

The consistency of results from the two models used in this study suggests, with a certain degree of confidence, that the E wind shear (i.e., QBO W phase in the lower equatorial stratosphere) is more favorable for producing a longer stratospheric lifetime of SG aerosols. However, when the aerosol size distribution is explicitly calculated on-line with inclusion of the most important microphysical processes, the QBO modulation of the particle effective radius (see discussion relative to Fig. 7) implies that the largest surface cooling is achieved in the least favorable conditions in terms of stratospheric sulfate mass accumulation, that is with W wind shear (i.e., QBO E phase in the lower equatorial stratosphere). Niemeier and Timmreck (2015) and later Niemeier and Schmidt (2017) have already pointed out that larger injections tend to be less efficient in terms

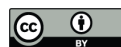

of radiative forcing. Our results can add to this the observation that, since injections under an E shear produce a decreased scattering (and forcing) efficiency, the most favorable SG scenario would be one that tends to prolong the E shear as little as possible. For instance, taking as an example the results shown in Aquila et al. (2014), we can suppose that the 2.5 Tg-S/yr injection scenario, that only prolonged the QBO E shear, would have been (had those simulations had an interactive aerosol microphysics) more favorable in terms of radiative forcing rather than the 5 Tg-S/yr scenario, that locked it completely in a E shear.

Regarding surface deposition, in agreement with Kravitz et al. (2009), we found for both ULAQ-CCM and GEOS-Chem that sulfur deposition changes are never above 15% of the Base scenario, and that over continents they are on average around 5% for either models. However, when looking more in depth, a large inter-hemispheric difference is present (3.8% for the Northern Hemisphere against 10.3% for the Southern Hemisphere), and the same differences can be seen when looking at single areas, such as those where very little deposition is present in the first place: Oceania and South America, with  $8.8 \pm 0.7\%$  and  $9.0 \pm 1.4\%$  respectively, and Antarctica, with  $7.7 \pm 0.7\%$  (the uncertainties given here should be intended as variations in the annual deposition due to different QBO phases). While in those areas both models agree on the magnitude of the changes, in some other areas, such as the Arctic Ocean ( $2.3 \pm 0.3\%$  in GEOS-Chem against  $14.7 \pm 2.2\%$  in ULAQ-CCM) or Africa ( $11.0 \pm 1.8\%$  against  $2.1 \pm 1.3\%$ , in GEOS-Chem and ULAQ-CCM, respectively), the differences between models are large and the results do not allow a definitive answer. Regarding polar regions, especially in the NH where the two models differ significantly, ULAQ-CCM values seem to be more in line with the findings of Marshall et al. (2017) and retrieved values from ice cores after the Tambora eruption (at least indirectly, via a linear emission scaling, and then only in a first approximation).

Furthermore, these deposition results could be scaled down when considering stratospheric sulfur injections lower than 4 Tg-S/yr. This might happen, for instance, in the following cases: 1) a less aggressive approach is considered to achieve different temperature reduction targets (Tilmes et al. (2016)); 2) we consider different scenarios over which to apply the proposed solar radiation management (MacMartin et al. (2014)) or 3) the sum all of indirect radiative effects of SG end up producing a negative forcing that, by going the same way as the direct solar radiation scattering, would allow for a smaller injection to obtain a certain target (Vioni et al. (2017a)). As an example, considering the 2.5 Tg-S/yr injection proposed in the GeoMIP G4 experiment (Kravitz et al. (2011)), the resulting deposition would be lowered down to 2.3% in the NH and 6.4% in the SH. On the other hand, if we consider higher injection scenario, with modification of the QBO shear,

Furthermore, these deposition results could be further scaled when considering lower stratospheric sulfate injections than 4 Tg-S/yr, in case a less aggressive approach is considered to achieve different temperature reduction targets (Tilmes et al. (2016)), or considering different scenarios over which to apply the proposed solar radiation management (MacMartin et al. (2014)). As an example, considering the 2.5 Tg-S/yr injection proposed in the GeoMIP experiment (Kravitz et al. (2011)), the resulting deposition would be lowered down to 2.3% in the NH and 6.4% in the SH with a simple scaling. On the other hand, if we consider higher injection scenario that would produce a modification of the QBO shear, a stronger deposition over the tropical regions should be expected, as discussed in Fig. 12, and a simple scaling of the obtained results would not be possible



anymore.

As already noted by Kravitz et al. (2009), deposition results do not take into account local changes in precipitation patterns that might occur over specific areas of the globe, or the response of single ecosystems, but they might give some indications towards which areas might get affected more. In this way, the results obtained in this study should not be considered as an endorsement of sulfate geoengineering, and more results on this subject are needed, especially regarding the sulfur deposition increase over Arctic and Antarctic polar regions. We also believe that the need for further studies regarding SG is highlighted (as shown in this paper) by the complexity and non-linear interaction among some processes that together regulate the latitude-longitude distribution of sulfur deposition changes, namely aerosol microphysics and heating rates, QBO, forcing efficiency, circulation changes.

*Data availability.* Data from model simulations are available from the corresponding author.

*Competing interests.* The authors declare no conflict of interest

*Acknowledgements.* P.T. is beneficiary of an AXA Research Found postdoctoral grant.



## References

- Amos, H. M., Jacob, D. J., Holmes, C. D., Fisher, J. A., Wang, Q., Yantosca, R. M., Corbitt, E. S., Galarneau, E., Rutter, A. P., Gustin, M. S., Steffen, A., Schauer, J. J., Graydon, J. A., Louis, V. L. S., Talbot, R. W., Edgerton, E. S., Zhang, Y., and Sunderland, E. M.: Gas-particle partitioning of atmospheric Hg(II) and its effect on global mercury deposition, *Atmospheric Chemistry and Physics*, 12, 591–603, doi:10.5194/acp-12-591-2012, <https://www.atmos-chem-phys.net/12/591/2012/>, 2012.
- 5 Aquila, V., Garfinkel, C., Newman, P., Oman, L., and Waugh, D.: Modifications of the quasi-biennial oscillation by a geoengineering perturbation of the stratospheric aerosol layer, *Geophysical Research Letters*, 41, 1738–1744, 2014.
- Bey, I., Jacob, D. J., Yantosca, R. M., Logan, J. A., Field, B. D., Fiore, A. M., Li, Q., Liu, H. Y., Mickley, L. J., and Schultz, M. G.: Global modeling of tropospheric chemistry with assimilated meteorology: Model description and evaluation, *Journal of Geophysical Research: Atmospheres*, 106, 23 073–23 095, doi:10.1029/2001JD000807, <http://dx.doi.org/10.1029/2001JD000807>, 2001.
- 10 Bian, H. and Prather, M. J.: Fast-J2: Accurate Simulation of Stratospheric Photolysis in Global Chemical Models, *Journal of Atmospheric Chemistry*, 41, 281–296, doi:10.1023/A:1014980619462, <https://doi.org/10.1023/A:1014980619462>, 2002.
- Budyko, M. I.: The Climate of the Future, pp. 197–245, American Geophysical Union, doi:10.1002/9781118665251.ch7, <http://dx.doi.org/10.1002/9781118665251.ch7>, 2013.
- 15 Butchart, N., Cionni, I., Eyring, V., Shepherd, T. G., Waugh, D. W., Akiyoshi, H., Austin, J., Brühl, C., Chipperfield, M. P., Cordero, E., Dameris, M., Deckert, R., Dhomse, S., Frith, S. M., Garcia, R. R., Gettelman, A., Giorgetta, M. A., Kinnison, D. E., Li, F., Mancini, E., McLandress, C., Pawson, S., Pitari, G., Plummer, D. A., Rozanov, E., Sassi, F., Scinocca, J. F., Shibata, K., Steil, B., and Tian, W.: Chemistry–Climate Model Simulations of Twenty-First Century Stratospheric Climate and Circulation Changes, *Journal of Climate*, 23, 5349–5374, doi:10.1175/2010JCLI3404.1, <https://doi.org/10.1175/2010JCLI3404.1>, 2010.
- 20 Chou, M. M. J. S. X. L.: A thermal infrared radiation parameterization for atmospheric studies, Tech. Rep. TM-2001-104606, NASA, NASA Goddard Space Flight Cent., Greenbelt, MD, 2001.
- Clegg, S. M. and Abbatt, J. P. D.: Oxidation of SO<sub>2</sub> by H<sub>2</sub>O<sub>2</sub> on ice surfaces at 228 K: a sink for SO<sub>2</sub> in ice clouds, *Atmospheric Chemistry and Physics*, 1, 73–78, doi:10.5194/acp-1-73-2001, <https://www.atmos-chem-phys.net/1/73/2001/>, 2001.
- Crutzen, P. J.: Albedo Enhancement by Stratospheric Sulfur Injections: A Contribution to Resolve a Policy Dilemma?, *Climatic Change*, 77, 211–220, doi:10.1007/s10584-006-9101-y, <http://dx.doi.org/10.1007/s10584-006-9101-y>, 2006.
- 25 Eastham, S. D., Weisenstein, D. K., and Barrett, S. R.: Development and evaluation of the unified tropospheric–stratospheric chemistry extension (UCX) for the global chemistry-transport model GEOS-Chem, *Atmospheric Environment*, 89, 52 – 63, doi:<https://doi.org/10.1016/j.atmosenv.2014.02.001>, <http://www.sciencedirect.com/science/article/pii/S1352231014000971>, 2014.
- Eyring, V., Butchart, N., Waugh, D. W., Akiyoshi, H., Austin, J., Bekki, S., Bodeker, G. E., Boville, B. A., Bruhl, C., Chipperfield, M. P., Cordero, E., Dameris, M., Deushi, M., Fioletov, V. E., Frith, S. M., Garcia, R. R., Gettelman, A., Giorgetta, M. A., Grewe, V., Jourdain, L., Kinnison, D. E., Mancini, E., Manzini, E., Marchand, M., Marsh, D. R., Nagashima, T., Newman, P. A., Nielsen, J. E., Pawson, S., Pitari, G., Plummer, D. A., Rozanov, E., Schraner, M., Shepherd, T. G., Shibata, K., Stolarski, R. S., Struthers, H., Tian, W., and Yoshiki, M.: Assessment of temperature, trace species, and ozone in chemistry-climate model simulations of the recent past, *Journal of Geophysical Research: Atmospheres*, 111, n/a–n/a, doi:10.1029/2006JD007327, d22308, 2006.
- 30 Eyring, V., Arblaster, J. M., Cionni, I., Sedlacek, J., Perlwitz, J., Young, P. J., Bekki, S., Bergmann, D., Cameron-Smith, P., Collins, W. J., Faluvegi, G., Gottschaldt, K.-D., Horowitz, L. W., Kinnison, D. E., Lamarque, J.-F., Marsh, D. R., Saint-Martin, D., Shindell, D. T., Sudo,





- K., Szopa, S., and Watanabe, S.: Long-term ozone changes and associated climate impacts in CMIP5 simulations, *Journal of Geophysical Research: Atmospheres*, 118, 5029–5060, doi:10.1002/jgrd.50316, <http://dx.doi.org/10.1002/jgrd.50316>, 2013.
- Feichter, J., Kjellström, E., Rodhe, H., Dentener, F., Lelieveld, J., and Roelofs, G.-J.: Simulation of the tropospheric sulfur cycle in a global climate model, *Atmospheric Environment*, 30, 1693 – 1707, doi:[https://doi.org/10.1016/1352-2310\(95\)00394-0](https://doi.org/10.1016/1352-2310(95)00394-0), <http://www.sciencedirect.com/science/article/pii/S1352231095003940>, joint 8th CAGCP and 2nd IGAC Conference on Global Atmospheric Chemistry, 1996.
- 5 Fisher, J. A., Jacob, D. J., Wang, Q., Bahreini, R., Carouge, C. C., Cubison, M. J., Dibb, J. E., Diehl, T., Jimenez, J. L., Leibensohn, E. M., Lu, Z., Meinders, M. B., Pye, H. O., Quinn, P. K., Sharma, S., Streets, D. G., van Donkelaar, A., and Yantosca, R. M.: Sources, distribution, and acidity of sulfate–ammonium aerosol in the Arctic in winter–spring, *Atmospheric Environment*, 45, 7301 – 7318, doi:<https://doi.org/10.1016/j.atmosenv.2011.08.030>, <http://www.sciencedirect.com/science/article/pii/S1352231011008545>, 2011.
- 10 Gao, C., Oman, L., Robock, A., and Stenchikov, G. L.: Atmospheric volcanic loading derived from bipolar ice cores: Accounting for the spatial distribution of volcanic deposition, *Journal of Geophysical Research: Atmospheres*, 112, n/a–n/a, doi:10.1029/2006JD007461, <http://dx.doi.org/10.1029/2006JD007461>, d09109, 2007.
- Gottelman, A., Hegglin, M. I., Son, S.-W., Kim, J., Fujiwara, M., Birner, T., Kremser, S., Rex, M., Anel, J. A., Akiyoshi, H., Austin, J., Bekki, S., Braesicke, P., Bruhl, C., Butchart, N., Chipperfield, M., Dameris, M., Dhomse, S., Garny, H., Hardiman, S. C., Jockel, P., Kinnison, D. E., Lamarque, J. F., Mancini, E., Marchand, M., Michou, M., Morgenstern, O., Pawson, S., Pitari, G., Plummer, D., Pyle, J. A., Rozanov, E., Scinocca, J., Shepherd, T. G., Shibata, K., Smale, D., Teyssedre, H., and Tian, W.: Multimodel assessment of the upper troposphere and lower stratosphere: Tropics and global trends, *Journal of Geophysical Research: Atmospheres*, 115, n/a–n/a, doi:10.1029/2009JD013638, <http://dx.doi.org/10.1029/2009JD013638>, d00M08, 2010.
- 15 Grainger, R. G., Lambert, A., Rodgers, C. D., Taylor, F. W., and Deshler, T.: Stratospheric aerosol effective radius, surface area and volume estimated from infrared measurements, *Journal of Geophysical Research: Atmospheres*, 100, 16 507–16 518, doi:10.1029/95JD00988, <http://dx.doi.org/10.1029/95JD00988>, 1995.
- Grant, W. B., Fishman, J., Browell, E. V., Brackett, V. G., Nganga, D., Minga, A., Cros, B., Veiga, R. E., Butler, C. F., Fenn, M. A., and Nowicki, G. D.: Observations of reduced ozone concentrations in the tropical stratosphere after the eruption of Mt. Pinatubo, *Geophysical Research Letters*, 19, 1109–1112, doi:10.1029/92GL01153, <http://dx.doi.org/10.1029/92GL01153>, 1992.
- 25 Hegglin, M. I., Gottelman, A., Hoor, P., Krichevsky, R., Manney, G. L., Pan, L. L., Son, S.-W., Stiller, G., Tilmes, S., Walker, K. A., Eyring, V., Shepherd, T. G., Waugh, D., Akiyoshi, H., Anel, J. A., Austin, J., Baumgaertner, A., Bekki, S., Braesicke, P., Bruhl, C., Butchart, N., Chipperfield, M. P., Dameris, M., Dhomse, S., Frith, S., Garny, H., Hardiman, S. C., Jockel, P., Kinnison, D. E., Lamarque, J. F., Mancini, E., Michou, M., Morgenstern, O., Nakamura, T., Olivie, D., Pawson, S., Pitari, G., Plummer, D. A., Pyle, J. A., Rozanov, E., Scinocca, J. F., Shibata, K., Smale, D., Teyssedre, H., Tian, W., and Yamashita, Y.: Multimodel assessment of the upper troposphere and lower stratosphere: Extra-tropics, *Journal of Geophysical Research: Atmospheres*, 115, D00M09, doi:10.1029/2010JD013884, <https://hal.archives-ouvertes.fr/hal-00510687>, 2010.
- 30 Holton, J. R. and Tan, H.-C.: The Influence of the Equatorial Quasi-Biennial Oscillation on the Global Circulation at 50 mb, *Journal of the Atmospheric Sciences*, 37, 2200–2208, doi:10.1175/1520-0469(1980)037<2200:TIOTEQ>2.0.CO;2, [https://doi.org/10.1175/1520-0469\(1980\)037<2200:TIOTEQ>2.0.CO;2](https://doi.org/10.1175/1520-0469(1980)037<2200:TIOTEQ>2.0.CO;2), 1980.
- 35 Hommel, R., Timmreck, C., Giorgetta, M. A., and Graf, H. F.: Quasi-biennial oscillation of the tropical stratospheric aerosol layer, *Atmospheric Chemistry and Physics*, 15, 5557–5584, doi:10.5194/acp-15-5557-2015, <https://www.atmos-chem-phys.net/15/5557/2015/>, 2015.
- Hsu, J., Prather, M., and Wild, O.: Diagnosing the stratosphere-to-troposphere flux of ozone in a chemistry transport model, *Journal of Geophysical Research: Atmospheres*, 110, –, doi:10.1029/2005JD006045, 2005.



- IPCC: Climate Change 2013: The Physical Science Basis. Contribution of Working Group I to the Fifth Assessment Report of the Intergovernmental Panel on Climate Change, Cambridge Univ. Press, Cambridge, 2013.
- Kirchner, I., Stenchikov, G. L., Graf, H.-F., Robock, A., and Antuna, J. C.: Climate model simulation of winter warming and summer cooling following the 1991 Mount Pinatubo volcanic eruption, *Journal of Geophysical Research: Atmospheres*, 104, 19 039–19 055, doi:10.1029/1999JD900213, <http://dx.doi.org/10.1029/1999JD900213>, 1999.
- 5 Kravitz, B., Robock, A., Oman, L., Stenchikov, G., and Marquardt, A. B.: Sulfuric acid deposition from stratospheric geoengineering with sulfate aerosols, *Journal of Geophysical Research: Atmospheres*, 114, n/a–n/a, doi:10.1029/2009JD011918, <http://dx.doi.org/10.1029/2009JD011918>, d14109, 2009.
- Kravitz, B., Robock, A., Boucher, O., Schmidt, H., Taylor, K. E., Stenchikov, G., and Schulz, M.: The Geoengineering Model Intercomparison Project (GeoMIP), *Atmospheric Science Letters*, 12, 162–167, doi:10.1002/asl.316, <http://dx.doi.org/10.1002/asl.316>, 2011.
- 10 Kravitz, B., Robock, A., and Haywood, J. M.: Progress in climate model simulations of geoengineering, *Eos, Transactions American Geophysical Union*, 93, 340–340, doi:10.1029/2012EO350009, <http://dx.doi.org/10.1029/2012EO350009>, 2012.
- Labitzke, K. and McCormick, M. P.: Stratospheric temperature increases due to Pinatubo aerosols, *Geophysical Research Letters*, 19, 207–210, doi:10.1029/91GL02940, <http://dx.doi.org/10.1029/91GL02940>, 1992.
- 15 Lamarque, J.-F., Bond, T. C., Eyring, V., Granier, C., Heil, A., Klimont, Z., Lee, D., Liou, S. C., Mieville, A., Owen, B., Schultz, M. G., Shindell, D., Smith, S. J., Stehfest, E., Van Aardenne, J., Cooper, O. R., Kainuma, M., Mahowald, N., McConnell, J. R., Naik, V., Riahi, K., and van Vuuren, D. P.: Historical (1850–2000) gridded anthropogenic and biomass burning emissions of reactive gases and aerosols: methodology and application, *Atmospheric Chemistry and Physics*, 10, 7017–7039, doi:10.5194/acp-10-7017-2010, <http://www.atmos-chem-phys.net/10/7017/2010/>, 2010.
- 20 Lamarque, J.-F., Dentener, F., McConnell, J., Ro, C.-U., Shaw, M., Vet, R., Bergmann, D., Cameron-Smith, P., Dalsoren, S., Doherty, R., Faluvegi, G., Ghan, S. J., Josse, B., Lee, Y. H., MacKenzie, I. A., Plummer, D., Shindell, D. T., Skeie, R. B., Stevenson, D. S., Strode, S., Zeng, G., Curran, M., Dahl-Jensen, D., Das, S., Fritzsche, D., and Nolan, M.: Multi-model mean nitrogen and sulfur deposition from the Atmospheric Chemistry and Climate Model Intercomparison Project (ACCMIP): evaluation of historical and projected future changes, *Atmospheric Chemistry and Physics*, 13, 7997–8018, doi:10.5194/acp-13-7997-2013, <https://www.atmos-chem-phys.net/13/7997/2013/>, 2013.
- 25 Lambert, A., Grainger, R. G., Remedios, J. J., Rodgers, C. D., Corney, M., and Taylor, F. W.: Measurements of the evolution of the Mt. Pinatubo aerosol cloud by ISAMS, *Geophysical Research Letters*, 20, 1287–1290, doi:10.1029/93GL00827, <http://dx.doi.org/10.1029/93GL00827>, 1993.
- Lin, J.-T. and McElroy, M. B.: Impacts of boundary layer mixing on pollutant vertical profiles in the lower troposphere: Implications to satellite remote sensing, *Atmospheric Environment*, 44, 1726 – 1739, doi:https://doi.org/10.1016/j.atmosenv.2010.02.009, <http://www.sciencedirect.com/science/article/pii/S1352231010001147>, 2010.
- 30 Lin, S.-J. and Rood, R. B.: Multidimensional Flux-Form Semi-Lagrangian Transport Schemes, *Monthly Weather Review*, 124, 2046–2070, doi:10.1175/1520-0493(1996)124<2046:MFFSLT>2.0.CO;2, [https://doi.org/10.1175/1520-0493\(1996\)124<2046:MFFSLT>2.0.CO;2](https://doi.org/10.1175/1520-0493(1996)124<2046:MFFSLT>2.0.CO;2), 1996.
- 35 Liu, H., Jacob, D. J., Bey, I., and Yantosca, R. M.: Constraints from <sup>210</sup>Pb and <sup>7</sup>Be on wet deposition and transport in a global three-dimensional chemical tracer model driven by assimilated meteorological fields, *Journal of Geophysical Research: Atmospheres*, 106, 12 109–12 128, doi:10.1029/2000JD900839, <http://dx.doi.org/10.1029/2000JD900839>, 2001.



- Long, C. S. and Stowe, L. L.: using the NOAA/AVHRR to study stratospheric aerosol optical thicknesses following the Mt. Pinatubo Eruption, *Geophysical Research Letters*, 21, 2215–2218, doi:10.1029/94GL01322, <http://dx.doi.org/10.1029/94GL01322>, 1994.
- MacMartin, D. G., Caldeira, K., and Keith, D. W.: Solar geoengineering to limit the rate of temperature change, *Philosophical Transactions of the Royal Society of London A: Mathematical, Physical and Engineering Sciences*, 372, doi:10.1098/rsta.2014.0134, <http://rsta.royalsocietypublishing.org/content/372/2031/20140134>, 2014.
- 5 MacMartin, D. G., Kravitz, B., Long, J. C. S., and Rasch, P. J.: Geoengineering with stratospheric aerosols: What do we not know after a decade of research?, *Earth's Future*, 4, 543–548, doi:10.1002/2016EF000418, <http://dx.doi.org/10.1002/2016EF000418>, 2016.
- Marshall, L., Schmidt, A., Toohey, M., Carslaw, K. S., Mann, G. W., Sigl, M., Khodri, M., Timmreck, C., Zanchettin, D., Ball, W., Bekki, S., Brooke, J. S. A., Dhomse, S., Johnson, C., Lamarque, J.-F., LeGrande, A., Mills, M. J., Niemeier, U., Poulain, V., Robock, A., Rozanov, E., Stenke, A., Sukhodolov, T., Tilmes, S., Tsigaridis, K., and Tummon, F.: Multi-model comparison of the volcanic sulfate deposition from the 1815 eruption of Mt. Tambora, *Atmospheric Chemistry and Physics Discussions*, 2017, 1–39, doi:10.5194/acp-2017-729, <https://www.atmos-chem-phys-discuss.net/acp-2017-729/>, 2017.
- McCormick, M. P. and Veiga, R. E.: SAGE II measurements of early Pinatubo aerosols, *Geophysical Research Letters*, 19, 155–158, doi:10.1029/91GL02790, <http://dx.doi.org/10.1029/91GL02790>, 1992.
- 15 Morgenstern, O., Giorgetta, M. A., Shibata, K., Eyring, V., Waugh, D. W., Shepherd, T. G., Akiyoshi, H., Austin, J., Baumgaertner, A. J. G., Bekki, S., Braesicke, P., Bruhl, C., Chipperfield, M. P., Cugnet, D., Dameris, M., Dhomse, S., Frith, S. M., Garny, H., Gettelman, A., Hardiman, S. C., Hegglin, M. I., Jockel, P., Kinnison, D. E., Lamarque, J.-F., Mancini, E., Manzini, E., Marchand, M., Michou, M., Nakamura, T., Nielsen, J. E., Olivie, D., Pitari, G., Plummer, D. A., Rozanov, E., Scinocca, J. F., Smale, D., Teyssedre, H., Toohey, M., Tian, W., and Yamashita, Y.: Review of the formulation of present-generation stratospheric chemistry-climate models and associated external forcings, *Journal of Geophysical Research: Atmospheres*, 115, n/a–n/a, doi:10.1029/2009JD013728, <http://dx.doi.org/10.1029/2009JD013728>, d00M02, 2010.
- 20 Morgenstern, O., Hegglin, M. I., Rozanov, E., O'Connor, F. M., Abraham, N. L., Akiyoshi, H., Archibald, A. T., Bekki, S., Butchart, N., Chipperfield, M. P., Deushi, M., Dhomse, S. S., Garcia, R. R., Hardiman, S. C., Horowitz, L. W., Jockel, P., Josse, B., Kinnison, D., Lin, M., Mancini, E., Manyin, M. E., Marchand, M., Marecal, V., Michou, M., Oman, L. D., Pitari, G., Plummer, D. A., Revell, L. E., Saint-Martin, D., Schofield, R., Stenke, A., Stone, K., Sudo, K., Tanaka, T. Y., Tilmes, S., Yamashita, Y., Yoshida, K., and Zeng, G.: Review of the global models used within phase 1 of the Chemistry–Climate Model Initiative (CCMI), *Geoscientific Model Development*, 10, 639–671, doi:10.5194/gmd-10-639-2017, <https://www.geosci-model-dev.net/10/639/2017/>, 2017.
- Muller, J.-F. and Brasseur, G.: IMAGES: A three-dimensional chemical transport model of the global troposphere, *Journal of Geophysical Research: Atmospheres*, 100, 16 445–16 490, doi:10.1029/94JD03254, <http://dx.doi.org/10.1029/94JD03254>, 1995.
- 30 Niemeier, U. and Schmidt, H.: Changing transport processes in the stratosphere by radiative heating of sulfate aerosols, *Atmospheric Chemistry and Physics Discussions*, 2017, 1–24, doi:10.5194/acp-2017-470, <https://www.atmos-chem-phys-discuss.net/acp-2017-470/>, 2017.
- Niemeier, U. and Tilmes, S.: Sulfur injections for a cooler planet, *Science*, 357, 246–248, doi:10.1126/science.aan3317, <http://science.sciencemag.org/content/357/6348/246>, 2017.
- 35 Niemeier, U. and Timmreck, C.: What is the limit of climate engineering by stratospheric injection of SO<sub>2</sub>?, *Atmospheric Chemistry and Physics*, 15, 9129–9141, doi:10.5194/acp-15-9129-2015, <https://www.atmos-chem-phys.net/15/9129/2015/>, 2015.



- Park, R. J., Jacob, D. J., Chin, M., and Martin, R. V.: Sources of carbonaceous aerosols over the United States and implications for natural visibility, *Journal of Geophysical Research: Atmospheres*, 108, n/a–n/a, doi:10.1029/2002JD003190, <http://dx.doi.org/10.1029/2002JD003190>, 4355, 2003.
- Park, R. J., Jacob, D. J., Field, B. D., Yantosca, R. M., and Chin, M.: Natural and transboundary pollution influences on sulfate-nitrate-ammonium aerosols in the United States: Implications for policy, *Journal of Geophysical Research: Atmospheres*, 109, n/a–n/a, doi:10.1029/2003JD004473, <http://dx.doi.org/10.1029/2003JD004473>, d15204, 2004.
- Parrella, J. P., Jacob, D. J., Liang, Q., Zhang, Y., Mickley, L. J., Miller, B., Evans, M. J., Yang, X., Pyle, J. A., Theys, N., and Van Roozendaal, M.: Tropospheric bromine chemistry: implications for present and pre-industrial ozone and mercury, *Atmospheric Chemistry and Physics*, 12, 6723–6740, doi:10.5194/acp-12-6723-2012, <https://www.atmos-chem-phys.net/12/6723/2012/>, 2012.
- 10 Pitari, G.: A Numerical Study of the Possible Perturbation of Stratospheric Dynamics Due to Pinatubo Aerosols: Implications for Tracer Transport, *Journal of the Atmospheric Sciences*, 50, 2443–2461, doi:10.1175/1520-0469(1993)050<2443:ANSOTP>2.0.CO;2, [https://doi.org/10.1175/1520-0469\(1993\)050<2443:ANSOTP>2.0.CO;2](https://doi.org/10.1175/1520-0469(1993)050<2443:ANSOTP>2.0.CO;2), 1993.
- Pitari, G., Mancini, E., Rizi, V., and Shindell, D. T.: Impact of Future Climate and Emission Changes on Stratospheric Aerosols and Ozone, *Journal of the Atmospheric Sciences*, 59, 414–440, doi:10.1175/1520-0469(2002)059<0414:IOFCAE>2.0.CO;2, [https://doi.org/10.1175/1520-0469\(2002\)059<0414:IOFCAE>2.0.CO;2](https://doi.org/10.1175/1520-0469(2002)059<0414:IOFCAE>2.0.CO;2), 2002.
- 15 Pitari, G., Aquila, V., Kravitz, B., Robock, A., Watanabe, S., Cionni, I., Luca, N. D., Genova, G. D., Mancini, E., and Tilmes, S.: Stratospheric ozone response to sulfate geoengineering: Results from the Geoengineering Model Intercomparison Project (GeoMIP), *Journal of Geophysical Research: Atmospheres*, 119, 2629–2653, doi:10.1002/2013JD020566, <http://dx.doi.org/10.1002/2013JD020566>, 2014.
- Pitari, G., Cionni, I., Di Genova, G., Visionsi, D., Gandolfi, I., and Mancini, E.: Impact of Stratospheric Volcanic Aerosols on Age-of-Air and Transport of Long-Lived Species, *Atmosphere*, 7, <http://www.mdpi.com/2073-4433/7/11/149>, 2016a.
- 20 Pitari, G., Di Genova, G., Mancini, E., Visionsi, D., Gandolfi, I., and Cionni, I.: Stratospheric Aerosols from Major Volcanic Eruptions: A Composition-Climate Model Study of the Aerosol Cloud Dispersal and e-folding Time, *Atmosphere*, 7, 75, doi:10.3390/atmos7060075, <http://dx.doi.org/10.3390/atmos7060075>, 2016b.
- Pitari, G., Visionsi, D., Mancini, E., Cionni, I., Di Genova, G., and Gandolfi, I.: Sulfate Aerosols from Non-Explosive Volcanoes: Chemical-Radiative Effects in the Troposphere and Lower Stratosphere, *Atmosphere*, 7, <http://www.mdpi.com/2073-4433/7/7/85>, 2016c.
- 25 Randles, C. A., Kinne, S., Myhre, G., Schulz, M., Stier, P., Fischer, J., Doppler, L., Highwood, E., Ryder, C., Harris, B., Huttunen, J., Ma, Y., Pinker, R. T., Mayer, B., Neubauer, D., Hitzenberger, R., Oreopoulos, L., Lee, D., Pitari, G., Di Genova, G., Quaas, J., Rose, F. G., Kato, S., Rumbold, S. T., Vardavas, I., Hatzianastassiou, N., Matsoukas, C., Yu, H., Zhang, F., Zhang, H., and Lu, P.: Intercomparison of shortwave radiative transfer schemes in global aerosol modeling: results from the AeroCom Radiative Transfer Experiment, *Atmospheric Chemistry and Physics*, 13, 2347–2379, doi:10.5194/acp-13-2347-2013, <https://www.atmos-chem-phys.net/13/2347/2013/>, 2013.
- 30 Robock, A., Kravitz, B., and Boucher, O.: Standardizing experiments in geoengineering, *Eos, Transactions American Geophysical Union*, 92, 197–197, doi:10.1029/2011EO230008, <http://dx.doi.org/10.1029/2011EO230008>, 2011.
- Sigl, M., Winstrup, M., McConnell, J. R., Welten, K. C., Plunkett, G., Ludlow, F., Buntgen, U., Caffee, M., Chellman, N., Dahl-Jensen, D., Fischer, H., Kipfstuhl, S., Kostick, C., Maselli, O. J., Mekhaldi, F., Mulvaney, R., Muscheler, R., Pasteris, D. R., Pilcher, J. R., Salzer, M., Schupbach, S., Steffensen, J. P., Vinther, B. M., and Woodruff, T. E.: Timing and climate forcing of volcanic eruptions for the past 2,500 years, *Nature*, 523, 543–549, <http://dx.doi.org/10.1038/nature14565>, 2015.



- Soden, B. J., Wetherald, R. T., Stenchikov, G. L., and Robock, A.: Global Cooling After the Eruption of Mount Pinatubo: A Test of Climate Feedback by Water Vapor, *Science*, 296, 727–730, doi:10.1126/science.296.5568.727, <http://science.sciencemag.org/content/296/5568/727>, 2002.
- Taylor, K. E., Stouffer, R. J., and Meehl, G. A.: An overview of CMIP5 and the experiment design, *Bulletin of the American Meteorological Society*, 93, 485, 2012.
- Tilmes, S., Muller, R., and Salawitch, R.: The Sensitivity of Polar Ozone Depletion to Proposed Geoengineering Schemes, *Science*, 320, 1201–1204, doi:10.1126/science.1153966, <http://science.sciencemag.org/content/320/5880/1201>, 2008.
- Tilmes, S., Kinnison, D. E., Garcia, R. R., Salawitch, R., Canty, T., Lee-Taylor, J., Madronich, S., and Chance, K.: Impact of very short-lived halogens on stratospheric ozone abundance and UV radiation in a geo-engineered atmosphere, *Atmospheric Chemistry and Physics*, 12, 10 945–10 955, doi:10.5194/acp-12-10945-2012, <http://www.atmos-chem-phys.net/12/10945/2012/>, 2012.
- Tilmes, S., Mills, M. J., Niemeier, U., Schmidt, H., Robock, A., Kravitz, B., Lamarque, J.-F., Pitari, G., and English, J. M.: A new Geoengineering Model Intercomparison Project (GeoMIP) experiment designed for climate and chemistry models, *Geoscientific Model Development*, 8, 43–49, doi:10.5194/gmd-8-43-2015, <https://www.geosci-model-dev.net/8/43/2015/>, 2015.
- Tilmes, S., Sanderson, B. M., and O'Neill, B. C.: Climate impacts of geoengineering in a delayed mitigation scenario, *Geophysical Research Letters*, 43, 8222–8229, doi:10.1002/2016GL070122, <http://dx.doi.org/10.1002/2016GL070122>, 2016GL070122, 2016.
- Trepte, C. R. and Hitchman, M. H.: Tropical stratospheric circulation deduced from satellite aerosol data, *Nature*, 355, 626–628, doi:10.1038/355626a0, 1992.
- Vet, R., Artz, R. S., Carou, S., Shaw, M., Ro, C.-U., Aas, W., Baker, A., Bowersox, V. C., Dentener, F., Galy-Lacaux, C., Hou, A., Pienaar, J. J., Gillett, R., Forti, M. C., Gromov, S., Hara, H., Khodzher, T., Mahowald, N. M., Nickovic, S., Rao, P., and Reid, N. W.: A global assessment of precipitation chemistry and deposition of sulfur, nitrogen, sea salt, base cations, organic acids, acidity and pH, and phosphorus, *Atmospheric Environment*, 93, 3 – 100, doi:<https://doi.org/10.1016/j.atmosenv.2013.10.060>, <http://www.sciencedirect.com/science/article/pii/S1352231013008133>, a global assessment of precipitation chemistry and deposition of sulfur, nitrogen, sea salt, base cations, organic acids, acidity and pH, and phosphorus, 2014.
- Visioni, D., Pitari, G., and Aquila, V.: Sulfate geoengineering: a review of the factors controlling the needed injection of sulfur dioxide, *Atmos. Chem. Phys.*, 17, 3879–3889, doi:10.5194/acp-17-3879-2017, <http://www.atmos-chem-phys.net/17/3879/2017/>, 2017a.
- Visioni, D., Pitari, G., Aquila, V., Tilmes, S., Cionni, I., Di Genova, G., and Mancini, E.: Sulfate geoengineering impact on methane transport and lifetime: results from the Geoengineering Model Intercomparison Project (GeoMIP), *Atmospheric Chemistry and Physics*, 17, 11 209–11 226, doi:10.5194/acp-17-11209-2017, <https://www.atmos-chem-phys.net/17/11209/2017/>, 2017b.
- Wang, Y., Jacob, D. J., and Logan, J. A.: Global simulation of tropospheric O<sub>3</sub>-NO<sub>x</sub>-hydrocarbon chemistry: 1. Model formulation, *Journal of Geophysical Research: Atmospheres*, 103, 10 713–10 725, doi:10.1029/98JD00158, <http://dx.doi.org/10.1029/98JD00158>, 1998.
- Wesely, M.: Parameterization of surface resistances to gaseous dry deposition in regional-scale numerical models, *Atmospheric Environment* (1967), 23, 1293 – 1304, doi:[https://doi.org/10.1016/0004-6981\(89\)90153-4](https://doi.org/10.1016/0004-6981(89)90153-4), <http://www.sciencedirect.com/science/article/pii/0004698189901534>, 1989.
- Wu, S., Mickley, L. J., Jacob, D. J., Logan, J. A., Yantosca, R. M., and Rind, D.: Why are there large differences between models in global budgets of tropospheric ozone?, *Journal of Geophysical Research: Atmospheres*, 112, n/a–n/a, doi:10.1029/2006JD007801, <http://dx.doi.org/10.1029/2006JD007801>, d05302, 2007.

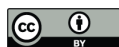

Xia, L., Nowack, P. J., Tilmes, S., and Robock, A.: Impacts of Stratospheric Sulfate Geoengineering on Tropospheric Ozone, Atmospheric Chemistry and Physics Discussions, 2017, 1–38, doi:10.5194/acp-2017-434, <http://www.atmos-chem-phys-discuss.net/acp-2017-434/>, 2017.

5 Zhang, L., Gong, S., Padro, J., and Barrie, L.: A size-segregated particle dry deposition scheme for an atmospheric aerosol module, Atmospheric Environment, 35, 549 – 560, doi:[https://doi.org/10.1016/S1352-2310\(00\)00326-5](https://doi.org/10.1016/S1352-2310(00)00326-5), <http://www.sciencedirect.com/science/article/pii/S1352231000003265>, 2001.
